# Supplementary material for: Attitudes, Knowledge and Factors Associated with Human Papillomavirus (HPV) Vaccine Uptake in Adolescent Girls and Young Women in Victoria, Australia
Source: PLoS One. 2016 Aug 26;11(8):e0161846. doi: 10.1371/journal.pone.0161846 (PMC5001625; doi:10.1371/journal.pone.0161846)
Supplement: S1 File — (XLS) [file pone.0161846.s001.xls]

## Sheet: Sheet1
studyno	Age	AgeAtSuppSurvey	gpvac	schoolvac	lastpap	parentalremoteness	ciguse	insure	agefirstsex	contranow	vacdec	vacdec2	genvacoppose	genvacop	opchivac	genchivacop	hpvvaccoppose	hpvvacop	hpvchivaccoppose	hpvchivacop	hpvvacstigma	hpvvacstig	hpvvacprom	chivac	vacstatusf	vacdecf	birthgp	status	psesf	cobf	pcob	plife	preligion
604	21	23		schoolvac		major city	never smoked	Yes			both parents	both parents	1 (strongly disagree)	Does not oppose	1 (strongly disagree)	Does not oppose	1 (strongly disagree)	Does not oppose	1 (strongly disagree)	Does not oppose	2	Does not oppose	Does not oppose	complete	vaccinated	parents	91-90	School eligible	less dissadvantaged	Au	Both parents OS born	None	both parents
281	22	25	unvaccinate	unvacc			never smoked	Yes	18 to 24	yes	self	self	1 (strongly disagree)	Does not oppose	1 (strongly disagree)	Does not oppose	1 (strongly disagree)	Does not oppose	1 (strongly disagree)	Does not oppose	1 (strongly disagree)	Does not oppose	Does not oppose	complete	unvaccinated	self	89-88	School eligible		other	Both parents OS born	1-3 partners	One parent
741	23	25	unvaccinate	unvacc	over 2 yrs		never smoked	No	11 to 17	none	self	self	1 (strongly disagree)	Does not oppose	1 (strongly disagree)	Does not oppose	1 (strongly disagree)	Does not oppose	1 (strongly disagree)	Does not oppose	2	Does not oppose	neutral	complete	unvaccinated	self	89-88	School eligible		other	Both parents OS born	4+	Non religious
457	23	26	GP			major city	never smoked	No			self	self	1 (strongly disagree)	Does not oppose	1 (strongly disagree)	Does not oppose	1 (strongly disagree)	Does not oppose	1 (strongly disagree)	Does not oppose	2	Does not oppose	neutral	complete	vaccinated	self	89-88	Cath up eligible	less dissadvantaged	Au	Both AU born	None	both parents
1437	19	19		schoolvac		major city	never smoked	Yes	11 to 17	yes	mum	mum	1 (strongly disagree)	Does not oppose	1 (strongly disagree)	Does not oppose	1 (strongly disagree)	Does not oppose	1 (strongly disagree)	Does not oppose	2	Does not oppose	Does not oppose	complete	vaccinated	parents	96-94	School eligible	less dissadvantaged	Au	One parent OS born	1-3 partners	Non religious
791	20	22		schoolvac		regoinal and remote	ever smoker	Yes	11 to 17	yes	mum	mum	1 (strongly disagree)	Does not oppose	1 (strongly disagree)	Does not oppose	1 (strongly disagree)	Does not oppose	1 (strongly disagree)	Does not oppose	4	neutral	Does not oppose	complete	vaccinated	parents	93-92	School eligible	More dissadvantaged	Au	Both AU born	4+	One parent
1094	21	22		schoolvac		major city	ever smoker	No	18 to 24	yes	mum	mum	1 (strongly disagree)	Does not oppose	1 (strongly disagree)	Does not oppose	1 (strongly disagree)	Does not oppose	1 (strongly disagree)	Does not oppose	3	neutral	Does not oppose	complete	vaccinated	parents	93-92	School eligible	less dissadvantaged		Both AU born	4+	both parents
1114	20	21		schoolvac		regoinal and remote	never smoked	Yes			mum	mum	1 (strongly disagree)	Does not oppose	1 (strongly disagree)	Does not oppose	1 (strongly disagree)	Does not oppose	1 (strongly disagree)	Does not oppose	1 (strongly disagree)	Does not oppose	Does not oppose	complete	vaccinated	parents	93-92	School eligible	More dissadvantaged	Au	Both AU born	None	both parents
312	24	27	GP			major city	never smoked	Yes	18 to 24	yes	self	self	1 (strongly disagree)	Does not oppose	1 (strongly disagree)	Does not oppose	1 (strongly disagree)	Does not oppose	1 (strongly disagree)	Does not oppose	6	oppose	neutral	complete	vaccinated	self	87-86	Cath up eligible	less dissadvantaged	Au	One parent OS born	1-3 partners	both parents
1308	23	23		schoolvac	within last 2 yrs	major city	never smoked	No	18 to 24	yes	mum	mum	2	Does not oppose	2	Does not oppose	2	Does not oppose	2	Does not oppose	4	neutral	Does not oppose	complete	vaccinated	parents	91-90	School eligible	less dissadvantaged	Au	Both parents OS born	4+	both parents
653	25	27	GP		within last 2 yrs	major city	never smoked	Yes	18 to 24	yes	self	self	1 (strongly disagree)	Does not oppose	1 (strongly disagree)	Does not oppose	1 (strongly disagree)	Does not oppose	1 (strongly disagree)	Does not oppose	2	Does not oppose	Does not oppose	complete	vaccinated	self	87-86	Cath up eligible	less dissadvantaged	Au	Both AU born	4+	One parent
1360	18	19	unvaccinate	unvacc			never smoked	Yes	11 to 17		self	self	1 (strongly disagree)	Does not oppose	7 (strongly agree)	oppose	1 (strongly disagree)	Does not oppose	1 (strongly disagree)	Does not oppose	1 (strongly disagree)	Does not oppose	Does not oppose	complete	unvaccinated	self	96-94	School eligible		other	Both parents OS born	1-3 partners
712	23	25		schoolvac	within last 2 yrs	major city	never smoked	Yes	11 to 17	yes	both parents	both parents	1 (strongly disagree)	Does not oppose	1 (strongly disagree)	Does not oppose	1 (strongly disagree)	Does not oppose	1 (strongly disagree)	Does not oppose	1 (strongly disagree)	Does not oppose	Does not oppose	complete	vaccinated	parents	89-88	School eligible	More dissadvantaged	Au	One parent OS born	4+	One parent
1383	18	19		schoolvac			never smoked	Yes			mum	mum	1 (strongly disagree)	Does not oppose	1 (strongly disagree)	Does not oppose	1 (strongly disagree)	Does not oppose	1 (strongly disagree)	Does not oppose	1 (strongly disagree)	Does not oppose	Does not oppose	complete	vaccinated	parents	96-94	School eligible		Au	Both AU born	None	both parents
492	19	21		schoolvac		major city	ever smoker	No	11 to 17	yes	mum	mum	1 (strongly disagree)	Does not oppose	1 (strongly disagree)	Does not oppose	1 (strongly disagree)	Does not oppose	1 (strongly disagree)	Does not oppose	1 (strongly disagree)	Does not oppose	Does not oppose	complete	vaccinated	parents	93-92	School eligible	less dissadvantaged	Au	Both AU born	4+	both parents
879	24	25		schoolvac	within last 2 yrs	major city	never smoked	Yes	18 to 24	yes	both parents	both parents	1 (strongly disagree)	Does not oppose	1 (strongly disagree)	Does not oppose	1 (strongly disagree)	Does not oppose	1 (strongly disagree)	Does not oppose	1 (strongly disagree)	Does not oppose	Does not oppose	complete	vaccinated	parents	89-88	School eligible	less dissadvantaged	Au	Both AU born	1-3 partners	Non religious
1396	24	24	GP		within last 2 yrs	major city	ever smoker	Yes	11 to 17	yes	self	self	1 (strongly disagree)	Does not oppose	1 (strongly disagree)	Does not oppose	1 (strongly disagree)	Does not oppose	1 (strongly disagree)	Does not oppose	1 (strongly disagree)	Does not oppose	neutral	complete	vaccinated	self	91-90	School eligible	less dissadvantaged	Au	One parent OS born	4+	One parent
1381	21	22		schoolvac	within last 2 yrs	regoinal and remote	never smoked	Yes	11 to 17	yes	mum	mum	1 (strongly disagree)	Does not oppose	1 (strongly disagree)	Does not oppose	1 (strongly disagree)	Does not oppose	1 (strongly disagree)	Does not oppose	1 (strongly disagree)	Does not oppose	Does not oppose	complete	vaccinated	parents	93-92	School eligible	More dissadvantaged	Au	Both AU born	4+	Non religious
320	22	25		schoolvac	within last 2 yrs	regoinal and remote	never smoked	No	18 to 24	yes	both parents	both parents	4	neutral	4	neutral	3	neutral	4	neutral	1 (strongly disagree)	Does not oppose	Does not oppose	complete	vaccinated	parents	89-88	School eligible	More dissadvantaged	Au	Both AU born	1-3 partners	Non religious
417	20	23		schoolvac		major city	never smoked	No			mum	mum	1 (strongly disagree)	Does not oppose	1 (strongly disagree)	Does not oppose	1 (strongly disagree)	Does not oppose	1 (strongly disagree)	Does not oppose	1 (strongly disagree)	Does not oppose	Does not oppose	complete	vaccinated	parents	91-90	School eligible	More dissadvantaged	Au	Both AU born	None	both parents
987	22	24		schoolvac	within last 2 yrs		never smoked	No	11 to 17	yes	mum	mum	1 (strongly disagree)	Does not oppose	1 (strongly disagree)	Does not oppose	1 (strongly disagree)	Does not oppose	1 (strongly disagree)	Does not oppose	4	neutral	Does not oppose	complete	vaccinated	parents	91-90	School eligible		Au	One parent OS born	4+	both parents
1227	23	24		schoolvac	within last 2 yrs	major city	never smoked	Yes	18 to 24	yes	self	self	2	Does not oppose	1 (strongly disagree)	Does not oppose	1 (strongly disagree)	Does not oppose	1 (strongly disagree)	Does not oppose	1 (strongly disagree)	Does not oppose	Does not oppose	complete	vaccinated	self	91-90	School eligible	less dissadvantaged	Au	Both AU born	4+
340	19	21	GP			major city	never smoked	No			both parents	both parents	1 (strongly disagree)	Does not oppose	1 (strongly disagree)	Does not oppose	1 (strongly disagree)	Does not oppose	1 (strongly disagree)	Does not oppose	1 (strongly disagree)	Does not oppose	Does not oppose	complete	vaccinated	parents	93-92	School eligible	less dissadvantaged	Au	Both parents OS born	None
1003	22	23		schoolvac	within last 2 yrs	major city	never smoked	Yes	18 to 24	yes	mum	mum	1 (strongly disagree)	Does not oppose	1 (strongly disagree)	Does not oppose	1 (strongly disagree)	Does not oppose	1 (strongly disagree)	Does not oppose	2	Does not oppose	Does not oppose	complete	vaccinated	parents	91-90	School eligible	less dissadvantaged	Au	Both AU born	1-3 partners	both parents
290	20	22	unvaccinate	unvacc			never smoked	No			both parents	both parents	1 (strongly disagree)	Does not oppose	1 (strongly disagree)	Does not oppose	1 (strongly disagree)	Does not oppose	1 (strongly disagree)	Does not oppose	1 (strongly disagree)	Does not oppose	Does not oppose	complete	unvaccinated	parents	93-92	School eligible		other	Both parents OS born		both parents
155	23	26	GP			major city	never smoked	Yes	18 to 24	yes	mum	mum	1 (strongly disagree)	Does not oppose	1 (strongly disagree)	Does not oppose	1 (strongly disagree)	Does not oppose	1 (strongly disagree)	Does not oppose	1 (strongly disagree)	Does not oppose	Does not oppose	complete	vaccinated	parents	89-88	Cath up eligible	less dissadvantaged	Au	Both AU born	1-3 partners	Non religious
711	18	20		schoolvac			never smoked	Yes			mum	mum	1 (strongly disagree)	Does not oppose	1 (strongly disagree)	Does not oppose	1 (strongly disagree)	Does not oppose	1 (strongly disagree)	Does not oppose	5	neutral	oppose	complete	vaccinated	parents	96-94	School eligible		Au	Both parents OS born	None	both parents
827	22	24		schoolvac	within last 2 yrs		never smoked	No	11 to 17	yes	self	self	1 (strongly disagree)	Does not oppose	1 (strongly disagree)	Does not oppose	1 (strongly disagree)	Does not oppose	1 (strongly disagree)	Does not oppose	1 (strongly disagree)	Does not oppose	Does not oppose	complete	vaccinated	self	91-90	School eligible		other	One parent OS born	4+	One parent
782	19	20		schoolvac		major city	never smoked	Yes			both parents	both parents	1 (strongly disagree)	Does not oppose	1 (strongly disagree)	Does not oppose	1 (strongly disagree)	Does not oppose	1 (strongly disagree)	Does not oppose	1 (strongly disagree)	Does not oppose	Does not oppose	complete	vaccinated	parents	96-94	School eligible	less dissadvantaged	Au	Both AU born	None	both parents
681	22	24		schoolvac	over 2 yrs	major city	never smoked	Yes	18 to 24	yes	mum	mum	1 (strongly disagree)	Does not oppose	1 (strongly disagree)	Does not oppose	1 (strongly disagree)	Does not oppose	1 (strongly disagree)	Does not oppose	1 (strongly disagree)	Does not oppose	neutral	complete	vaccinated	parents	91-90	School eligible	less dissadvantaged	Au	Both parents OS born	1-3 partners	both parents
181	21	24		schoolvac		regoinal and remote	ever smoker	No			mum	mum	1 (strongly disagree)	Does not oppose	1 (strongly disagree)	Does not oppose	1 (strongly disagree)	Does not oppose	1 (strongly disagree)	Does not oppose	7 (strongly agree)	oppose	Does not oppose	complete	vaccinated	parents	91-90	School eligible	less dissadvantaged	Au	Both AU born	None	One parent
169	19	22		schoolvac		regoinal and remote	never smoked	No			both parents	both parents	1 (strongly disagree)	Does not oppose	1 (strongly disagree)	Does not oppose	1 (strongly disagree)	Does not oppose	1 (strongly disagree)	Does not oppose	5	neutral	oppose	complete	vaccinated	parents	93-92	School eligible	More dissadvantaged	Au	Both AU born	None	both parents
500	19	22		schoolvac	within last 2 yrs	regoinal and remote	never smoked	Yes	11 to 17	yes	mum	mum	1 (strongly disagree)	Does not oppose	1 (strongly disagree)	Does not oppose	1 (strongly disagree)	Does not oppose	1 (strongly disagree)	Does not oppose	1 (strongly disagree)	Does not oppose	Does not oppose	complete	vaccinated	parents	93-92	School eligible	less dissadvantaged	Au	Both AU born	1-3 partners	both parents
99	23	27	unvaccinate	unvacc	within last 2 yrs	major city	ever smoker	Yes	11 to 17	yes	both parents	both parents	4	neutral	2	Does not oppose	5	neutral	5	neutral	3	neutral	Does not oppose	incomplete	unvaccinated	parents	87-86	Cath up eligible	less dissadvantaged	Au	Both AU born	4+	both parents
767	18	20		schoolvac		regoinal and remote	never smoked	Yes			both parents	both parents	1 (strongly disagree)	Does not oppose	1 (strongly disagree)	Does not oppose	1 (strongly disagree)	Does not oppose	1 (strongly disagree)	Does not oppose	1 (strongly disagree)	Does not oppose	Does not oppose	complete	vaccinated	parents	96-94	School eligible	More dissadvantaged	Au	Both AU born	None	One parent
824	18	20		schoolvac		regoinal and remote	never smoked	No	11 to 17	none	both parents	both parents	1 (strongly disagree)	Does not oppose	1 (strongly disagree)	Does not oppose	1 (strongly disagree)	Does not oppose	1 (strongly disagree)	Does not oppose	1 (strongly disagree)	Does not oppose	Does not oppose	complete	vaccinated	parents	96-94	School eligible	less dissadvantaged	Au	Both AU born	4+	Non religious
252	22	25		schoolvac		regoinal and remote	never smoked	No	18 to 24	yes	both parents	both parents	1 (strongly disagree)	Does not oppose	1 (strongly disagree)	Does not oppose	1 (strongly disagree)	Does not oppose	1 (strongly disagree)	Does not oppose	1 (strongly disagree)	Does not oppose	Does not oppose	complete	vaccinated	parents	89-88	School eligible	less dissadvantaged	Au	One parent OS born	4+	both parents
989	23	24		schoolvac	within last 2 yrs	regoinal and remote	never smoked	Yes	18 to 24	yes	self	self	1 (strongly disagree)	Does not oppose	1 (strongly disagree)	Does not oppose	1 (strongly disagree)	Does not oppose	1 (strongly disagree)	Does not oppose	1 (strongly disagree)	Does not oppose	Does not oppose	complete	vaccinated	self	91-90	School eligible	More dissadvantaged	Au	Both AU born	4+	One parent
1395	22	22		schoolvac	within last 2 yrs	major city	never smoked	Yes	18 to 24	none	mum	mum	1 (strongly disagree)	Does not oppose	1 (strongly disagree)	Does not oppose	1 (strongly disagree)	Does not oppose	1 (strongly disagree)	Does not oppose	3	neutral	neutral	complete	vaccinated	parents	93-92	School eligible	less dissadvantaged	other	Both parents OS born	1-3 partners	both parents
1353	25	26	GP			major city	ever smoker	No	11 to 17	yes	self	self	1 (strongly disagree)	Does not oppose	1 (strongly disagree)	Does not oppose	1 (strongly disagree)	Does not oppose	1 (strongly disagree)	Does not oppose	1 (strongly disagree)	Does not oppose	Does not oppose	complete	vaccinated	self	89-88	Cath up eligible	less dissadvantaged	Au	Both AU born	4+	Non religious
734	18	20		schoolvac		major city	never smoked	No	11 to 17	yes	mum	mum	1 (strongly disagree)	Does not oppose	1 (strongly disagree)	Does not oppose	1 (strongly disagree)	Does not oppose	1 (strongly disagree)	Does not oppose	1 (strongly disagree)	Does not oppose	Does not oppose	complete	vaccinated	parents	96-94	School eligible	less dissadvantaged	Au	One parent OS born	4+	both parents
657	18	20		schoolvac		regoinal and remote	never smoked	Yes	11 to 17	yes	mum	mum	1 (strongly disagree)	Does not oppose	1 (strongly disagree)	Does not oppose	1 (strongly disagree)	Does not oppose	1 (strongly disagree)	Does not oppose	2	Does not oppose	Does not oppose	complete	vaccinated	parents	96-94	School eligible	More dissadvantaged	Au	Both AU born	1-3 partners	One parent
334	25	27	GP		within last 2 yrs	major city	never smoked	No	18 to 24	yes	self	self	1 (strongly disagree)	Does not oppose	1 (strongly disagree)	Does not oppose	1 (strongly disagree)	Does not oppose	1 (strongly disagree)	Does not oppose	1 (strongly disagree)	Does not oppose	Does not oppose	complete	vaccinated	self	87-86	Cath up eligible	less dissadvantaged	other	Both parents OS born	4+	One parent
1077	20	21		schoolvac		major city	never smoked	Yes	11 to 17	yes	both parents	both parents	1 (strongly disagree)	Does not oppose	1 (strongly disagree)	Does not oppose	1 (strongly disagree)	Does not oppose	1 (strongly disagree)	Does not oppose	1 (strongly disagree)	Does not oppose	Does not oppose	complete	vaccinated	parents	93-92	School eligible	less dissadvantaged	Au	One parent OS born	4+	Non religious
545	18	20		schoolvac		major city	never smoked	Yes	11 to 17	yes	both parents	both parents	1 (strongly disagree)	Does not oppose	1 (strongly disagree)	Does not oppose	1 (strongly disagree)	Does not oppose	1 (strongly disagree)	Does not oppose	2	Does not oppose	Does not oppose	complete	vaccinated	parents	96-94	School eligible	less dissadvantaged	other	One parent OS born	4+	both parents
1136	22	23		schoolvac		major city	never smoked	No	11 to 17	yes	both parents	both parents	2	Does not oppose	2	Does not oppose	2	Does not oppose	2	Does not oppose	2	Does not oppose	Does not oppose	complete	vaccinated	parents	91-90	School eligible	More dissadvantaged	Au	Both AU born	1-3 partners	Non religious
574	19	21		schoolvac	within last 2 yrs	regoinal and remote	never smoked	Yes	11 to 17	yes	both parents	both parents	1 (strongly disagree)	Does not oppose	1 (strongly disagree)	Does not oppose	1 (strongly disagree)	Does not oppose	1 (strongly disagree)	Does not oppose	1 (strongly disagree)	Does not oppose	Does not oppose	complete	vaccinated	parents	93-92	School eligible	More dissadvantaged	Au	Both AU born	4+	One parent
548	23	26	GP		within last 2 yrs	major city	never smoked	No	11 to 17	yes	self	self	1 (strongly disagree)	Does not oppose	1 (strongly disagree)	Does not oppose	1 (strongly disagree)	Does not oppose	1 (strongly disagree)	Does not oppose	1 (strongly disagree)	Does not oppose	Does not oppose	complete	vaccinated	self	89-88	Cath up eligible	less dissadvantaged	Au	Both parents OS born	1-3 partners	both parents
880	25	26	GP		within last 2 yrs	major city	never smoked	No	11 to 17	yes	self	self	1 (strongly disagree)	Does not oppose	1 (strongly disagree)	Does not oppose	1 (strongly disagree)	Does not oppose	1 (strongly disagree)	Does not oppose	1 (strongly disagree)	Does not oppose	Does not oppose	complete	vaccinated	self	89-88	Cath up eligible	More dissadvantaged	Au	Both AU born	4+	One parent
398	20	23		schoolvac		major city		Yes	18 to 24	yes	mum	mum	1 (strongly disagree)	Does not oppose	1 (strongly disagree)	Does not oppose	1 (strongly disagree)	Does not oppose	1 (strongly disagree)	Does not oppose	4	neutral	Does not oppose	complete	vaccinated	parents	91-90	School eligible	less dissadvantaged	Au	Both AU born	1-3 partners	both parents
1338	20	21		schoolvac		major city	never smoked	Yes	18 to 24	yes	both parents	both parents	1 (strongly disagree)	Does not oppose	1 (strongly disagree)	Does not oppose	1 (strongly disagree)	Does not oppose	1 (strongly disagree)	Does not oppose	1 (strongly disagree)	Does not oppose	neutral	complete	vaccinated	parents	93-92	School eligible	less dissadvantaged	Au	Both AU born	1-3 partners	both parents
640	25	27	GP		within last 2 yrs	major city	never smoked	No	11 to 17	yes	self	self	1 (strongly disagree)	Does not oppose	1 (strongly disagree)	Does not oppose	1 (strongly disagree)	Does not oppose	1 (strongly disagree)	Does not oppose	1 (strongly disagree)	Does not oppose	Does not oppose	complete	vaccinated	self	87-86	Cath up eligible	less dissadvantaged	Au	Both AU born	1-3 partners	One parent
550	19	21	unvaccinate	unvacc		regoinal and remote	never smoked	Yes			both parents	both parents	2	Does not oppose	6	oppose	3	neutral	3	neutral	5	neutral	Does not oppose	complete	unvaccinated	parents	93-92	School eligible	More dissadvantaged	Au	One parent OS born	None	both parents
708	23	25	GP		within last 2 yrs	major city	ever smoker	Yes	11 to 17	yes	mum	mum	1 (strongly disagree)	Does not oppose	1 (strongly disagree)	Does not oppose	1 (strongly disagree)	Does not oppose	1 (strongly disagree)	Does not oppose	1 (strongly disagree)	Does not oppose	Does not oppose	complete	vaccinated	parents	89-88	School eligible	less dissadvantaged	Au	Both AU born	4+	One parent
391	23	26	GP		within last 2 yrs	regoinal and remote	never smoked	Yes	18 to 24	yes	self	self	1 (strongly disagree)	Does not oppose	1 (strongly disagree)	Does not oppose	1 (strongly disagree)	Does not oppose	1 (strongly disagree)	Does not oppose	1 (strongly disagree)	Does not oppose	Does not oppose	complete	vaccinated	self	89-88	Cath up eligible	less dissadvantaged	Au	Both AU born	1-3 partners	Non religious
134	24	27	GP			major city	ever smoker	Yes	11 to 17	yes	self	self	1 (strongly disagree)	Does not oppose	1 (strongly disagree)	Does not oppose	1 (strongly disagree)	Does not oppose	1 (strongly disagree)	Does not oppose	1 (strongly disagree)	Does not oppose	neutral	complete	vaccinated	self	87-86	Cath up eligible	less dissadvantaged	Au	Both AU born	1-3 partners	One parent
1280	24	25	unvaccinate	unvacc			never smoked	No		yes	both parents	both parents	1 (strongly disagree)	Does not oppose	1 (strongly disagree)	Does not oppose	1 (strongly disagree)	Does not oppose	1 (strongly disagree)	Does not oppose	5	neutral	neutral	complete	unvaccinated	parents	89-88	School eligible		other	Both parents OS born	1-3 partners	both parents
862	19	20		schoolvac	within last 2 yrs	major city	never smoked	Yes	11 to 17	yes	both parents	both parents	1 (strongly disagree)	Does not oppose	1 (strongly disagree)	Does not oppose	1 (strongly disagree)	Does not oppose	1 (strongly disagree)	Does not oppose	3	neutral	neutral	complete	vaccinated	parents	96-94	School eligible	less dissadvantaged	Au	Both AU born	1-3 partners	One parent
353	24	27	GP			major city	never smoked	Yes			mum	mum	1 (strongly disagree)	Does not oppose	1 (strongly disagree)	Does not oppose	1 (strongly disagree)	Does not oppose	1 (strongly disagree)	Does not oppose	1 (strongly disagree)	Does not oppose	Does not oppose	complete	vaccinated	parents	87-86	Cath up eligible	less dissadvantaged	Au	Both AU born	None	both parents
667	25	27	GP		within last 2 yrs	major city	ever smoker	No	11 to 17	yes	self	self	1 (strongly disagree)	Does not oppose	1 (strongly disagree)	Does not oppose	1 (strongly disagree)	Does not oppose	1 (strongly disagree)	Does not oppose	1 (strongly disagree)	Does not oppose	Does not oppose	complete	vaccinated	self	87-86	Cath up eligible	More dissadvantaged	Au	Both AU born	4+	One parent
1270	18	19	unvaccinate	unvacc		major city	never smoked	Yes			mum	mum	1 (strongly disagree)	Does not oppose	1 (strongly disagree)	Does not oppose	1 (strongly disagree)	Does not oppose	1 (strongly disagree)	Does not oppose	1 (strongly disagree)	Does not oppose	Does not oppose	complete	unvaccinated	parents	96-94	School eligible	less dissadvantaged	Au	Both AU born	None	One parent
1005	21	22	unvaccinate	unvacc	within last 2 yrs		ever smoker	Yes	18 to 24	yes	self	self	7 (strongly agree)	oppose	7 (strongly agree)	oppose	1 (strongly disagree)	Does not oppose	1 (strongly disagree)	Does not oppose	2	Does not oppose	Does not oppose	complete	unvaccinated	self	93-92	School eligible		Au	Both AU born	4+	both parents
1177	21	22	unvaccinate	unvacc		regoinal and remote	ever smoker	No	18 to 24	none	mum	mum	1 (strongly disagree)	Does not oppose	1 (strongly disagree)	Does not oppose	1 (strongly disagree)	Does not oppose	1 (strongly disagree)	Does not oppose	1 (strongly disagree)	Does not oppose	Does not oppose	incomplete	unvaccinated	parents	93-92	School eligible	More dissadvantaged	Au	Both AU born	4+	Non religious
1125	18	19		schoolvac		regoinal and remote	never smoked	No			mum	mum	1 (strongly disagree)	Does not oppose	1 (strongly disagree)	Does not oppose	6	oppose	6	oppose	1 (strongly disagree)	Does not oppose	Does not oppose	complete	vaccinated	parents	96-94	School eligible	less dissadvantaged	Au	Both AU born	None	both parents
914	25	26	GP		within last 2 yrs	major city	ever smoker	No	11 to 17	yes	self	self	2	Does not oppose	2	Does not oppose	1 (strongly disagree)	Does not oppose	1 (strongly disagree)	Does not oppose	3	neutral	Does not oppose	complete	vaccinated	self	89-88	Cath up eligible	less dissadvantaged	Au	Both AU born	4+	One parent
229	21	24		schoolvac	within last 2 yrs	major city	never smoked	No		yes	self	self	1 (strongly disagree)	Does not oppose	1 (strongly disagree)	Does not oppose	1 (strongly disagree)	Does not oppose	1 (strongly disagree)	Does not oppose	3	neutral	neutral	complete	vaccinated	self	91-90	School eligible	less dissadvantaged	Au	Both AU born
37	23	27	GP		within last 2 yrs	regoinal and remote	never smoked	Yes	18 to 24	yes	self	self	1 (strongly disagree)	Does not oppose	1 (strongly disagree)	Does not oppose	1 (strongly disagree)	Does not oppose	1 (strongly disagree)	Does not oppose	1 (strongly disagree)	Does not oppose	Does not oppose	complete	vaccinated	self	87-86	Cath up eligible	More dissadvantaged	Au	Both AU born	4+	both parents
1306	23	24	GP		within last 2 yrs	regoinal and remote	ever smoker	No	11 to 17	none	both parents	both parents	1 (strongly disagree)	Does not oppose	1 (strongly disagree)	Does not oppose	1 (strongly disagree)	Does not oppose	1 (strongly disagree)	Does not oppose	1 (strongly disagree)	Does not oppose	Does not oppose	complete	vaccinated	parents	91-90	School eligible	More dissadvantaged	Au	Both AU born		both parents
393	21	24		schoolvac		major city	never smoked	Yes	18 to 24	yes	self	self	1 (strongly disagree)	Does not oppose	1 (strongly disagree)	Does not oppose	1 (strongly disagree)	Does not oppose	1 (strongly disagree)	Does not oppose	1 (strongly disagree)	Does not oppose	Does not oppose	complete	vaccinated	self	91-90	School eligible	less dissadvantaged	Au	Both AU born	4+	Non religious
945	21	22		schoolvac	within last 2 yrs	major city	never smoked	No	18 to 24	yes	both parents	both parents	1 (strongly disagree)	Does not oppose	1 (strongly disagree)	Does not oppose	1 (strongly disagree)	Does not oppose	1 (strongly disagree)	Does not oppose	1 (strongly disagree)	Does not oppose	Does not oppose	complete	vaccinated	parents	93-92	School eligible	less dissadvantaged	Au	Both AU born	1-3 partners	both parents
1369	22	22		schoolvac	within last 2 yrs	major city	never smoked	Yes	11 to 17	yes	mum	mum	1 (strongly disagree)	Does not oppose	1 (strongly disagree)	Does not oppose	1 (strongly disagree)	Does not oppose	1 (strongly disagree)	Does not oppose	2	Does not oppose	Does not oppose	complete	vaccinated	parents	93-92	School eligible	less dissadvantaged	Au	One parent OS born	4+	One parent
747	19	21		schoolvac		major city	never smoked	Yes	18 to 24	yes	mum	mum	1 (strongly disagree)	Does not oppose	1 (strongly disagree)	Does not oppose	1 (strongly disagree)	Does not oppose	1 (strongly disagree)	Does not oppose	3	neutral	neutral	complete	vaccinated	parents	93-92	School eligible	less dissadvantaged	Au	Both AU born	1-3 partners	both parents
1058	19	21		schoolvac		regoinal and remote	never smoked	No	18 to 24	yes	self	self	1 (strongly disagree)	Does not oppose	1 (strongly disagree)	Does not oppose	1 (strongly disagree)	Does not oppose	1 (strongly disagree)	Does not oppose	1 (strongly disagree)	Does not oppose	Does not oppose	complete	vaccinated	self	93-92	School eligible	More dissadvantaged	Au	Both AU born	1-3 partners	both parents
873	24	25		schoolvac	within last 2 yrs	major city	never smoked	Yes	11 to 17	yes	self	self	2	Does not oppose	1 (strongly disagree)	Does not oppose	2	Does not oppose	2	Does not oppose	1 (strongly disagree)	Does not oppose	Does not oppose	complete	vaccinated	self	89-88	School eligible	less dissadvantaged	other	Both parents OS born	4+	Non religious
449	21	24		schoolvac		major city	never smoked	Yes	18 to 24	yes	self	self	1 (strongly disagree)	Does not oppose	1 (strongly disagree)	Does not oppose	1 (strongly disagree)	Does not oppose	1 (strongly disagree)	Does not oppose	1 (strongly disagree)	Does not oppose	Does not oppose	complete	vaccinated	self	91-90	School eligible	less dissadvantaged	Au	Both AU born	1-3 partners	both parents
680	24	26	GP		within last 2 yrs	regoinal and remote	never smoked	No	11 to 17	none	self	self	1 (strongly disagree)	Does not oppose	1 (strongly disagree)	Does not oppose	1 (strongly disagree)	Does not oppose	1 (strongly disagree)	Does not oppose	1 (strongly disagree)	Does not oppose	neutral	complete	vaccinated	self	89-88	Cath up eligible	less dissadvantaged	Au	Both AU born	4+	Non religious
567	23	25		schoolvac		major city	never smoked	Yes	18 to 24	yes	both parents	both parents	1 (strongly disagree)	Does not oppose	1 (strongly disagree)	Does not oppose	1 (strongly disagree)	Does not oppose	1 (strongly disagree)	Does not oppose	1 (strongly disagree)	Does not oppose	Does not oppose	complete	vaccinated	parents	89-88	School eligible	less dissadvantaged	Au	Both AU born	1-3 partners	One parent
159	18	21		schoolvac		major city	never smoked	No			both parents	both parents	1 (strongly disagree)	Does not oppose	1 (strongly disagree)	Does not oppose	1 (strongly disagree)	Does not oppose	1 (strongly disagree)	Does not oppose	2	Does not oppose	Does not oppose	complete	vaccinated	parents	93-92	School eligible	More dissadvantaged	Au	Both parents OS born	None	both parents
627	22	24		schoolvac			never smoked	Yes	18 to 24	none	mum	mum	1 (strongly disagree)	Does not oppose	1 (strongly disagree)	Does not oppose	4	neutral	2	Does not oppose	2	Does not oppose	neutral	complete	vaccinated	parents	91-90	School eligible		Au	One parent OS born		both parents
1111	24	25	unvaccinate	unvacc	within last 2 yrs	major city	ever smoker	No	11 to 17	yes	self	self	1 (strongly disagree)	Does not oppose	1 (strongly disagree)	Does not oppose	1 (strongly disagree)	Does not oppose	1 (strongly disagree)	Does not oppose	1 (strongly disagree)	Does not oppose	Does not oppose	complete	unvaccinated	self	89-88	School eligible	More dissadvantaged	Au	Both AU born	1-3 partners	both parents
1019	21	22		schoolvac	within last 2 yrs	regoinal and remote	never smoked	Yes	11 to 17	yes	mum	mum	1 (strongly disagree)	Does not oppose	1 (strongly disagree)	Does not oppose	1 (strongly disagree)	Does not oppose	1 (strongly disagree)	Does not oppose	3	neutral	neutral	complete	vaccinated	parents	93-92	School eligible	More dissadvantaged	Au	Both AU born	4+	both parents
305	19	22		schoolvac		major city	never smoked	No			both parents	both parents	1 (strongly disagree)	Does not oppose	1 (strongly disagree)	Does not oppose	1 (strongly disagree)	Does not oppose	1 (strongly disagree)	Does not oppose	1 (strongly disagree)	Does not oppose	Does not oppose	complete	vaccinated	parents	93-92	School eligible	More dissadvantaged	Au	One parent OS born	None	both parents
1244	18	19	unvaccinate	unvacc		major city	never smoked	Yes	11 to 17	yes	both parents	both parents	1 (strongly disagree)	Does not oppose	1 (strongly disagree)	Does not oppose	3	neutral	2	Does not oppose	6	oppose	neutral	complete	unvaccinated	parents	96-94	School eligible	less dissadvantaged	Au	Both parents OS born	1-3 partners	One parent
32	19	22	GP			regoinal and remote	never smoked	Yes	18 to 24	none	mum	mum	1 (strongly disagree)	Does not oppose	1 (strongly disagree)	Does not oppose	1 (strongly disagree)	Does not oppose	1 (strongly disagree)	Does not oppose	1 (strongly disagree)	Does not oppose	Does not oppose	complete	vaccinated	parents	93-92	School eligible	less dissadvantaged	Au	Both AU born	1-3 partners	both parents
371	19	22		schoolvac	within last 2 yrs	major city	never smoked	Yes	11 to 17	yes	mum	mum	1 (strongly disagree)	Does not oppose	1 (strongly disagree)	Does not oppose	1 (strongly disagree)	Does not oppose	1 (strongly disagree)	Does not oppose	1 (strongly disagree)	Does not oppose	Does not oppose	complete	vaccinated	parents	93-92	School eligible	More dissadvantaged	Au	One parent OS born	1-3 partners	Non religious
658	23	26	GP		within last 2 yrs	major city	never smoked	Yes	11 to 17	yes	self	self	1 (strongly disagree)	Does not oppose	1 (strongly disagree)	Does not oppose	1 (strongly disagree)	Does not oppose	1 (strongly disagree)	Does not oppose	3	neutral	neutral	complete	vaccinated	self	89-88	Cath up eligible	less dissadvantaged	Au	Both AU born	4+	One parent
601	20	22		schoolvac		major city	never smoked	Yes	11 to 17	yes	mum	mum	1 (strongly disagree)	Does not oppose	1 (strongly disagree)	Does not oppose	1 (strongly disagree)	Does not oppose	1 (strongly disagree)	Does not oppose	1 (strongly disagree)	Does not oppose	Does not oppose	complete	vaccinated	parents	93-92	School eligible	More dissadvantaged	Au	One parent OS born	4+	Non religious
479	21	24		schoolvac	within last 2 yrs	regoinal and remote	never smoked	No	11 to 17	yes	both parents	both parents	1 (strongly disagree)	Does not oppose	1 (strongly disagree)	Does not oppose	2	Does not oppose	2	Does not oppose	2	Does not oppose	Does not oppose	complete	vaccinated	parents	91-90	School eligible	less dissadvantaged	Au	Both AU born	1-3 partners	both parents
1410	21	22	unvaccinate	unvacc		regoinal and remote	never smoked	No			mum	mum	1 (strongly disagree)	Does not oppose	1 (strongly disagree)	Does not oppose	1 (strongly disagree)	Does not oppose	1 (strongly disagree)	Does not oppose	3	neutral	Does not oppose	complete	unvaccinated	parents	93-92	School eligible	less dissadvantaged	Au	Both AU born	None	Non religious
1022	19	20		schoolvac		regoinal and remote	never smoked	Yes	18 to 24	yes	mum	mum	1 (strongly disagree)	Does not oppose	1 (strongly disagree)	Does not oppose	1 (strongly disagree)	Does not oppose	1 (strongly disagree)	Does not oppose	1 (strongly disagree)	Does not oppose	Does not oppose	complete	vaccinated	parents	96-94	School eligible	More dissadvantaged	Au	Both AU born	1-3 partners	Non religious
1411	22	23	unvaccinate	unvacc			never smoked	Yes			self	self	1 (strongly disagree)	Does not oppose	1 (strongly disagree)	Does not oppose	3	neutral	5	neutral	1 (strongly disagree)	Does not oppose	Does not oppose	complete	unvaccinated	self	91-90	School eligible		other	Both parents OS born	None	both parents
176	24	27		schoolvac	within last 2 yrs	major city	never smoked	Yes	18 to 24	yes	mum	mum	1 (strongly disagree)	Does not oppose	1 (strongly disagree)	Does not oppose	1 (strongly disagree)	Does not oppose	1 (strongly disagree)	Does not oppose	1 (strongly disagree)	Does not oppose	Does not oppose	complete	vaccinated	parents	87-86	Cath up eligible	less dissadvantaged	Au	Both AU born	1-3 partners	both parents
382	23	26	GP				never smoked	Yes	18 to 24	yes	mum	mum	1 (strongly disagree)	Does not oppose	1 (strongly disagree)	Does not oppose	1 (strongly disagree)	Does not oppose	1 (strongly disagree)	Does not oppose	3	neutral	neutral	complete	vaccinated	parents	89-88	Cath up eligible		Au	Both AU born	1-3 partners	Non religious
194	19	22		schoolvac		regoinal and remote	never smoked	No	18 to 24	yes	mum	mum	1 (strongly disagree)	Does not oppose	1 (strongly disagree)	Does not oppose	1 (strongly disagree)	Does not oppose	1 (strongly disagree)	Does not oppose	1 (strongly disagree)	Does not oppose	Does not oppose	complete	vaccinated	parents	93-92	School eligible	More dissadvantaged	Au	Both AU born	1-3 partners	Non religious
534	20	22		schoolvac	within last 2 yrs	major city	never smoked	No		yes	mum	mum	1 (strongly disagree)	Does not oppose	1 (strongly disagree)	Does not oppose	1 (strongly disagree)	Does not oppose	1 (strongly disagree)	Does not oppose	1 (strongly disagree)	Does not oppose	Does not oppose	complete	vaccinated	parents	93-92	School eligible	less dissadvantaged	Au	Both AU born	1-3 partners	One parent
378	20	23		schoolvac		regoinal and remote	never smoked	Yes	18 to 24	yes	mum	mum	1 (strongly disagree)	Does not oppose	1 (strongly disagree)	Does not oppose	1 (strongly disagree)	Does not oppose	1 (strongly disagree)	Does not oppose	2	Does not oppose	Does not oppose	complete	vaccinated	parents	91-90	School eligible	More dissadvantaged	Au	Both AU born	1-3 partners	Non religious
301	19	22		schoolvac			never smoked	No			both parents	both parents	1 (strongly disagree)	Does not oppose	1 (strongly disagree)	Does not oppose	1 (strongly disagree)	Does not oppose	1 (strongly disagree)	Does not oppose	1 (strongly disagree)	Does not oppose	Does not oppose	complete	vaccinated	parents	93-92	School eligible		other	Both parents OS born	None	both parents
556	22	25		schoolvac	within last 2 yrs	major city	never smoked	Yes	18 to 24	yes	both parents	both parents	1 (strongly disagree)	Does not oppose	1 (strongly disagree)	Does not oppose	1 (strongly disagree)	Does not oppose	1 (strongly disagree)	Does not oppose	1 (strongly disagree)	Does not oppose	Does not oppose	complete	vaccinated	parents	91-90	School eligible	less dissadvantaged	Au	Both AU born	1-3 partners	both parents
168	23	25	unvaccinate	unvacc	within last 2 yrs	major city	ever smoker	Yes		none	self	self	3	neutral	3	neutral	7 (strongly agree)	oppose	7 (strongly agree)	oppose	1 (strongly disagree)	Does not oppose	Does not oppose	complete	unvaccinated	self	89-88	Cath up eligible	less dissadvantaged	other	Both parents OS born	4+	One parent
140	25	29	GP			major city	ever smoker	Yes			self	self	1 (strongly disagree)	Does not oppose	1 (strongly disagree)	Does not oppose	1 (strongly disagree)	Does not oppose	2	Does not oppose	1 (strongly disagree)	Does not oppose	Does not oppose	complete	vaccinated	self	87-86	Cath up eligible	less dissadvantaged	Au	One parent OS born	None	Non religious
600	19	21		schoolvac		major city	ever smoker	Yes	11 to 17	yes	both parents	both parents	2	Does not oppose	3	neutral	2	Does not oppose	2	Does not oppose	1 (strongly disagree)	Does not oppose	oppose	complete	vaccinated	parents	93-92	School eligible	less dissadvantaged	Au	One parent OS born	4+	both parents
142	23	26	GP		within last 2 yrs	regoinal and remote	ever smoker	Yes	11 to 17	yes	mum	mum	1 (strongly disagree)	Does not oppose	1 (strongly disagree)	Does not oppose	1 (strongly disagree)	Does not oppose	1 (strongly disagree)	Does not oppose	1 (strongly disagree)	Does not oppose	Does not oppose	incomplete	vaccinated	parents	89-88	Cath up eligible	More dissadvantaged	Au	Both AU born	4+	both parents
624	24	26	GP			major city	never smoked	Yes	11 to 17	yes	mum	mum	2	Does not oppose	2	Does not oppose	2	Does not oppose	2	Does not oppose	6	oppose	Does not oppose	complete	vaccinated	parents	89-88	Cath up eligible	less dissadvantaged	Au	One parent OS born	4+	both parents
854	23	24		schoolvac		major city	never smoked	Yes	18 to 24	none	mum	mum	1 (strongly disagree)	Does not oppose	1 (strongly disagree)	Does not oppose	1 (strongly disagree)	Does not oppose	1 (strongly disagree)	Does not oppose	1 (strongly disagree)	Does not oppose	Does not oppose	complete	vaccinated	parents	91-90	School eligible	less dissadvantaged	Au	One parent OS born	1-3 partners	One parent
907	20	22		schoolvac	within last 2 yrs	regoinal and remote	never smoked	Yes	11 to 17	yes	self	self	1 (strongly disagree)	Does not oppose	7 (strongly agree)	oppose	1 (strongly disagree)	Does not oppose	1 (strongly disagree)	Does not oppose	1 (strongly disagree)	Does not oppose	Does not oppose	complete	vaccinated	self	93-92	School eligible	less dissadvantaged	Au	One parent OS born	1-3 partners	Non religious
736	24	26	GP		within last 2 yrs	regoinal and remote	never smoked	Yes	11 to 17	yes	self	self	1 (strongly disagree)	Does not oppose	1 (strongly disagree)	Does not oppose	1 (strongly disagree)	Does not oppose	1 (strongly disagree)	Does not oppose	1 (strongly disagree)	Does not oppose	Does not oppose	complete	vaccinated	self	89-88	Cath up eligible	More dissadvantaged	Au	One parent OS born	1-3 partners	Non religious
1117	21	22		schoolvac	within last 2 yrs	major city	never smoked	Yes	11 to 17	yes	mum	mum	1 (strongly disagree)	Does not oppose	1 (strongly disagree)	Does not oppose	1 (strongly disagree)	Does not oppose	1 (strongly disagree)	Does not oppose	5	neutral	neutral	complete	vaccinated	parents	93-92	School eligible	less dissadvantaged	Au	Both AU born	4+	both parents
537	24	26	unvaccinate	unvacc	within last 2 yrs	regoinal and remote	never smoked	No	11 to 17	yes	self	self	1 (strongly disagree)	Does not oppose	1 (strongly disagree)	Does not oppose	1 (strongly disagree)	Does not oppose	1 (strongly disagree)	Does not oppose	1 (strongly disagree)	Does not oppose	neutral	complete	unvaccinated	self	89-88	Cath up eligible	More dissadvantaged	Au	Both AU born	4+	One parent
224	24	27	GP		within last 2 yrs	regoinal and remote	never smoked	No	11 to 17	yes	self	self	1 (strongly disagree)	Does not oppose	1 (strongly disagree)	Does not oppose	1 (strongly disagree)	Does not oppose	1 (strongly disagree)	Does not oppose	1 (strongly disagree)	Does not oppose	Does not oppose	complete	vaccinated	self	87-86	Cath up eligible	More dissadvantaged	Au	Both AU born	1-3 partners	both parents
807	20	22		schoolvac		regoinal and remote	never smoked	Yes	18 to 24	yes	both parents	both parents	1 (strongly disagree)	Does not oppose	1 (strongly disagree)	Does not oppose	1 (strongly disagree)	Does not oppose	1 (strongly disagree)	Does not oppose	2	Does not oppose	neutral	complete	vaccinated	parents	93-92	School eligible	More dissadvantaged	Au	Both AU born	1-3 partners	One parent
1072	24	25		schoolvac		regoinal and remote	never smoked	Yes	11 to 17	yes	self	self	1 (strongly disagree)	Does not oppose	1 (strongly disagree)	Does not oppose	1 (strongly disagree)	Does not oppose	1 (strongly disagree)	Does not oppose	1 (strongly disagree)	Does not oppose	Does not oppose	complete	vaccinated	self	89-88	School eligible	More dissadvantaged	Au	Both AU born	1-3 partners	both parents
463	18	21		schoolvac		major city	never smoked	No	11 to 17	none	both parents	both parents	1 (strongly disagree)	Does not oppose	1 (strongly disagree)	Does not oppose	1 (strongly disagree)	Does not oppose	1 (strongly disagree)	Does not oppose	1 (strongly disagree)	Does not oppose	Does not oppose	complete	vaccinated	parents	93-92	School eligible	less dissadvantaged	Au	Both AU born	1-3 partners	both parents
683	20	22		schoolvac		regoinal and remote	never smoked	No			mum	mum	1 (strongly disagree)	Does not oppose	1 (strongly disagree)	Does not oppose	1 (strongly disagree)	Does not oppose	1 (strongly disagree)	Does not oppose	1 (strongly disagree)	Does not oppose	Does not oppose	complete	vaccinated	parents	93-92	School eligible	More dissadvantaged	Au	Both AU born	None	One parent
651	18	20		schoolvac		major city	never smoked	No	11 to 17	yes	both parents	both parents	1 (strongly disagree)	Does not oppose	1 (strongly disagree)	Does not oppose	1 (strongly disagree)	Does not oppose	1 (strongly disagree)	Does not oppose	3	neutral	Does not oppose	complete	vaccinated	parents	96-94	School eligible	less dissadvantaged	Au	Both parents OS born	1-3 partners	Non religious
1406	22	23		schoolvac		major city	never smoked	No			mum	mum	1 (strongly disagree)	Does not oppose	1 (strongly disagree)	Does not oppose	1 (strongly disagree)	Does not oppose	1 (strongly disagree)	Does not oppose	1 (strongly disagree)	Does not oppose	Does not oppose	complete	vaccinated	parents	91-90	School eligible	less dissadvantaged	Au	One parent OS born	None	both parents
962	22	23	GP		over 2 yrs	regoinal and remote	never smoked	Yes	18 to 24	none	mum	mum	1 (strongly disagree)	Does not oppose	1 (strongly disagree)	Does not oppose	1 (strongly disagree)	Does not oppose	1 (strongly disagree)	Does not oppose	4	neutral	Does not oppose	complete	vaccinated	parents	91-90	School eligible	More dissadvantaged	Au	Both AU born	1-3 partners	Non religious
1184	24	25		schoolvac	within last 2 yrs	major city	never smoked	No	18 to 24	yes	mum	mum	1 (strongly disagree)	Does not oppose	1 (strongly disagree)	Does not oppose	1 (strongly disagree)	Does not oppose	1 (strongly disagree)	Does not oppose	1 (strongly disagree)	Does not oppose	Does not oppose	complete	vaccinated	parents	89-88	School eligible	less dissadvantaged	Au	One parent OS born	4+	both parents
120	21	24		schoolvac	within last 2 yrs	major city	never smoked	No	11 to 17	yes	mum	mum			1 (strongly disagree)	Does not oppose			1 (strongly disagree)	Does not oppose			Does not oppose	complete	vaccinated	parents	91-90	School eligible	More dissadvantaged	other	Both parents OS born	1-3 partners	both parents
569	19	21	GP			major city	never smoked	Yes	18 to 24	yes	both parents	both parents	1 (strongly disagree)	Does not oppose	1 (strongly disagree)	Does not oppose	1 (strongly disagree)	Does not oppose	1 (strongly disagree)	Does not oppose	2	Does not oppose	Does not oppose	complete	vaccinated	parents	93-92	School eligible	less dissadvantaged	Au	Both AU born		both parents
868	23	25		schoolvac	within last 2 yrs	major city	never smoked	Yes	11 to 17	yes	mum	mum	1 (strongly disagree)	Does not oppose	1 (strongly disagree)	Does not oppose	1 (strongly disagree)	Does not oppose	1 (strongly disagree)	Does not oppose	1 (strongly disagree)	Does not oppose	Does not oppose	complete	vaccinated	parents	89-88	School eligible	less dissadvantaged	Au	Both AU born	1-3 partners	One parent
1319	20	21	unvaccinate	unvacc		major city	never smoked	No	18 to 24	yes	mum	mum	3	neutral	2	Does not oppose	2	Does not oppose	2	Does not oppose	5	neutral	oppose	complete	unvaccinated	parents	93-92	School eligible	less dissadvantaged	Au	Both AU born	1-3 partners	both parents
1428	24	25	unvaccinate	unvacc	over 2 yrs	major city	ever smoker	No	18 to 24	none	mum	mum	2	Does not oppose	2	Does not oppose	6	oppose	3	neutral	2	Does not oppose	Does not oppose	complete	unvaccinated	parents	89-88	School eligible	less dissadvantaged	Au	Both AU born	4+	Non religious
1199	24	25		schoolvac		major city	never smoked	No	18 to 24	yes	mum	mum	1 (strongly disagree)	Does not oppose	1 (strongly disagree)	Does not oppose	1 (strongly disagree)	Does not oppose	1 (strongly disagree)	Does not oppose	1 (strongly disagree)	Does not oppose	Does not oppose	complete	vaccinated	parents	89-88	School eligible	More dissadvantaged	Au	One parent OS born	1-3 partners	both parents
1330	19	20		schoolvac		major city	never smoked	Yes			mum	mum	1 (strongly disagree)	Does not oppose	7 (strongly agree)	oppose	1 (strongly disagree)	Does not oppose	1 (strongly disagree)	Does not oppose	1 (strongly disagree)	Does not oppose	Does not oppose	complete	vaccinated	parents	96-94	School eligible	More dissadvantaged	Au	Both AU born	None	Non religious
1229	24	25	GP		within last 2 yrs	regoinal and remote	never smoked	Yes	18 to 24	yes	both parents	both parents	1 (strongly disagree)	Does not oppose	2	Does not oppose	2	Does not oppose	2	Does not oppose	2	Does not oppose	neutral	complete	vaccinated	parents	89-88	School eligible	More dissadvantaged	Au	Both AU born	4+	both parents
7	21	24	GP		within last 2 yrs	major city	never smoked	No	18 to 24	yes	both parents	both parents	1 (strongly disagree)	Does not oppose	1 (strongly disagree)	Does not oppose	1 (strongly disagree)	Does not oppose	1 (strongly disagree)	Does not oppose	2	Does not oppose	Does not oppose	complete	vaccinated	parents	91-90	School eligible	More dissadvantaged	Au	One parent OS born	1-3 partners	Non religious
777	24	25		schoolvac		regoinal and remote	never smoked	Yes			both parents	both parents	7 (strongly agree)	oppose	1 (strongly disagree)	Does not oppose	1 (strongly disagree)	Does not oppose	1 (strongly disagree)	Does not oppose	1 (strongly disagree)	Does not oppose	neutral	incomplete	vaccinated	parents	89-88	Cath up eligible	More dissadvantaged	Au	Both AU born	None	both parents
1387	19	20		schoolvac	within last 2 yrs	regoinal and remote	never smoked	Yes	11 to 17	yes	both parents	both parents	1 (strongly disagree)	Does not oppose	1 (strongly disagree)	Does not oppose	1 (strongly disagree)	Does not oppose	1 (strongly disagree)	Does not oppose	1 (strongly disagree)	Does not oppose	Does not oppose	complete	vaccinated	parents	96-94	School eligible	More dissadvantaged	Au	Both AU born	1-3 partners	One parent
1113	23	24		schoolvac	within last 2 yrs	regoinal and remote	ever smoker	Yes	11 to 17	none	self	self	1 (strongly disagree)	Does not oppose	1 (strongly disagree)	Does not oppose	1 (strongly disagree)	Does not oppose	1 (strongly disagree)	Does not oppose	3	neutral	Does not oppose	complete	vaccinated	self	91-90	School eligible	More dissadvantaged	Au	Both AU born	4+	both parents
410	23	25		schoolvac		regoinal and remote	never smoked	No			self	self	1 (strongly disagree)	Does not oppose	1 (strongly disagree)	Does not oppose	1 (strongly disagree)	Does not oppose	1 (strongly disagree)	Does not oppose	4	neutral	Does not oppose	incomplete	vaccinated	self	89-88	School eligible	less dissadvantaged	Au	Both AU born	None	One parent
357	24	27	GP		over 2 yrs	regoinal and remote	never smoked	No	11 to 17	yes	self	self	1 (strongly disagree)	Does not oppose	1 (strongly disagree)	Does not oppose	1 (strongly disagree)	Does not oppose	1 (strongly disagree)	Does not oppose	3	neutral	Does not oppose	complete	vaccinated	self	87-86	Cath up eligible	More dissadvantaged	Au	Both AU born	4+	both parents
594	22	25	GP		within last 2 yrs		ever smoker	Yes	11 to 17	yes	both parents	both parents	1 (strongly disagree)	Does not oppose	1 (strongly disagree)	Does not oppose	1 (strongly disagree)	Does not oppose	1 (strongly disagree)	Does not oppose	1 (strongly disagree)	Does not oppose	Does not oppose	complete	vaccinated	parents	89-88	School eligible		Au	One parent OS born	1-3 partners	One parent
796	20	22		schoolvac			never smoked	No			mum	mum	1 (strongly disagree)	Does not oppose	1 (strongly disagree)	Does not oppose	1 (strongly disagree)	Does not oppose	1 (strongly disagree)	Does not oppose	5	neutral	neutral	complete	vaccinated	parents	93-92	School eligible		Au	One parent OS born	None	both parents
31	23	26	GP			major city	never smoked	No	11 to 17	yes	self	self	1 (strongly disagree)	Does not oppose	1 (strongly disagree)	Does not oppose	1 (strongly disagree)	Does not oppose	1 (strongly disagree)	Does not oppose	1 (strongly disagree)	Does not oppose	Does not oppose	complete	vaccinated	self	89-88	Cath up eligible	less dissadvantaged	Au	Both AU born	1-3 partners	both parents
544	24	26	GP		within last 2 yrs	regoinal and remote	never smoked	No	18 to 24	yes	self	self	1 (strongly disagree)	Does not oppose	1 (strongly disagree)	Does not oppose	1 (strongly disagree)	Does not oppose	1 (strongly disagree)	Does not oppose	3	neutral	neutral	complete	vaccinated	self	89-88	Cath up eligible	less dissadvantaged	Au	One parent OS born	4+	Non religious
714	20	22		schoolvac	within last 2 yrs	major city	never smoked	Yes	18 to 24	yes	self	self	1 (strongly disagree)	Does not oppose	1 (strongly disagree)	Does not oppose	1 (strongly disagree)	Does not oppose	1 (strongly disagree)	Does not oppose	1 (strongly disagree)	Does not oppose	Does not oppose	complete	vaccinated	self	93-92	School eligible	less dissadvantaged	Au	Both AU born	1-3 partners	both parents
520	22	24		schoolvac	within last 2 yrs	major city	never smoked	No	11 to 17	yes	mum	mum	1 (strongly disagree)	Does not oppose	1 (strongly disagree)	Does not oppose	1 (strongly disagree)	Does not oppose	1 (strongly disagree)	Does not oppose	5	neutral	neutral	complete	vaccinated	parents	91-90	School eligible	More dissadvantaged	Au	Both parents OS born	1-3 partners	both parents
221	21	24		schoolvac	within last 2 yrs	major city	never smoked	Yes	18 to 24	yes	self	self	1 (strongly disagree)	Does not oppose	1 (strongly disagree)	Does not oppose	1 (strongly disagree)	Does not oppose	1 (strongly disagree)	Does not oppose	2	Does not oppose	Does not oppose	complete	vaccinated	self	91-90	School eligible	less dissadvantaged	Au	Both AU born	4+	One parent
409	19	22	unvaccinate	unvacc			never smoked	No	11 to 17	yes	self	self	1 (strongly disagree)	Does not oppose	1 (strongly disagree)	Does not oppose	1 (strongly disagree)	Does not oppose	1 (strongly disagree)	Does not oppose	2	Does not oppose	Does not oppose	complete	unvaccinated	self	93-92	School eligible		Au	Both AU born	1-3 partners	both parents
702	21	24		schoolvac		major city	never smoked	Yes			both parents	both parents	1 (strongly disagree)	Does not oppose	1 (strongly disagree)	Does not oppose	1 (strongly disagree)	Does not oppose	1 (strongly disagree)	Does not oppose	4	neutral	neutral	complete	vaccinated	parents	91-90	School eligible	less dissadvantaged	Au	Both AU born	None	both parents
1235	22	23		schoolvac	within last 2 yrs	major city	never smoked	Yes	11 to 17	yes	mum	mum	1 (strongly disagree)	Does not oppose	1 (strongly disagree)	Does not oppose	1 (strongly disagree)	Does not oppose	1 (strongly disagree)	Does not oppose	1 (strongly disagree)	Does not oppose	neutral	complete	vaccinated	parents	91-90	School eligible	less dissadvantaged	Au	Both AU born	1-3 partners	both parents
335	20	23		schoolvac		major city	never smoked	Yes	11 to 17	yes	mum	mum	1 (strongly disagree)	Does not oppose	1 (strongly disagree)	Does not oppose	1 (strongly disagree)	Does not oppose	1 (strongly disagree)	Does not oppose	1 (strongly disagree)	Does not oppose	Does not oppose	complete	vaccinated	parents	91-90	School eligible	less dissadvantaged	other	Both parents OS born	4+	Non religious
876	22	24		schoolvac	within last 2 yrs	regoinal and remote	never smoked	No	11 to 17	yes	self	self	1 (strongly disagree)	Does not oppose	1 (strongly disagree)	Does not oppose	1 (strongly disagree)	Does not oppose	1 (strongly disagree)	Does not oppose	1 (strongly disagree)	Does not oppose	Does not oppose	complete	vaccinated	self	91-90	School eligible	More dissadvantaged	Au	One parent OS born	4+	One parent
426	23	26	GP		within last 2 yrs	regoinal and remote	ever smoker	No	11 to 17	yes	self	self	1 (strongly disagree)	Does not oppose	1 (strongly disagree)	Does not oppose	1 (strongly disagree)	Does not oppose	1 (strongly disagree)	Does not oppose	3	neutral	Does not oppose	complete	vaccinated	self	89-88	Cath up eligible	More dissadvantaged	Au	Both AU born	4+	both parents
522	20	23		schoolvac		major city	ever smoker	No	18 to 24	yes	mum	mum	1 (strongly disagree)	Does not oppose	1 (strongly disagree)	Does not oppose	1 (strongly disagree)	Does not oppose	1 (strongly disagree)	Does not oppose	4	neutral	neutral	incomplete	vaccinated	parents	91-90	School eligible	less dissadvantaged	Au	One parent OS born	1-3 partners	Non religious
222	21	24		schoolvac	within last 2 yrs	major city	never smoked	No	18 to 24	yes	mum	mum	1 (strongly disagree)	Does not oppose	1 (strongly disagree)	Does not oppose	1 (strongly disagree)	Does not oppose	1 (strongly disagree)	Does not oppose	1 (strongly disagree)	Does not oppose	Does not oppose	complete	vaccinated	parents	91-90	School eligible	less dissadvantaged	Au	Both parents OS born	1-3 partners	both parents
971	21	22		schoolvac	within last 2 yrs	major city	never smoked	Yes	11 to 17	yes	both parents	both parents	1 (strongly disagree)	Does not oppose	1 (strongly disagree)	Does not oppose	1 (strongly disagree)	Does not oppose	1 (strongly disagree)	Does not oppose	3	neutral	Does not oppose	complete	vaccinated	parents	93-92	School eligible	less dissadvantaged	Au	Both AU born	4+	both parents
874	24	26	GP			regoinal and remote	ever smoker	No	11 to 17	yes	self	self	1 (strongly disagree)	Does not oppose	1 (strongly disagree)	Does not oppose	1 (strongly disagree)	Does not oppose	1 (strongly disagree)	Does not oppose	1 (strongly disagree)	Does not oppose	Does not oppose	complete	vaccinated	self	89-88	Cath up eligible	More dissadvantaged	Au	Both AU born	4+	Non religious
485	20	23		schoolvac	within last 2 yrs	regoinal and remote	never smoked	Yes	11 to 17	yes	mum	mum	1 (strongly disagree)	Does not oppose	1 (strongly disagree)	Does not oppose	1 (strongly disagree)	Does not oppose	1 (strongly disagree)	Does not oppose	1 (strongly disagree)	Does not oppose	Does not oppose	complete	vaccinated	parents	91-90	School eligible	More dissadvantaged	Au	Both AU born	1-3 partners	both parents
615	24	26	GP		within last 2 yrs	regoinal and remote	never smoked	Yes	18 to 24	yes	self	self	1 (strongly disagree)	Does not oppose	1 (strongly disagree)	Does not oppose	1 (strongly disagree)	Does not oppose	1 (strongly disagree)	Does not oppose	1 (strongly disagree)	Does not oppose	Does not oppose	complete	vaccinated	self	89-88	Cath up eligible	More dissadvantaged	Au	Both AU born	4+	Non religious
866	19	20		schoolvac		major city	never smoked	No	11 to 17	yes	both parents	both parents	1 (strongly disagree)	Does not oppose	1 (strongly disagree)	Does not oppose	1 (strongly disagree)	Does not oppose	1 (strongly disagree)	Does not oppose	4	neutral	Does not oppose	complete	vaccinated	parents	96-94	School eligible	less dissadvantaged	Au	Both AU born	1-3 partners	both parents
1393	25	26	GP		within last 2 yrs	regoinal and remote	never smoked	No	11 to 17	yes	mum	mum	1 (strongly disagree)	Does not oppose	1 (strongly disagree)	Does not oppose	1 (strongly disagree)	Does not oppose	1 (strongly disagree)	Does not oppose	1 (strongly disagree)	Does not oppose	Does not oppose	complete	vaccinated	parents	89-88	Cath up eligible	less dissadvantaged	Au	Both AU born	4+	both parents
1041	20	22		schoolvac	within last 2 yrs	major city	never smoked	Yes	18 to 24	yes	mum	mum	1 (strongly disagree)	Does not oppose	1 (strongly disagree)	Does not oppose	1 (strongly disagree)	Does not oppose	1 (strongly disagree)	Does not oppose	4	neutral	neutral	complete	vaccinated	parents	93-92	School eligible	less dissadvantaged	Au	One parent OS born	1-3 partners	Non religious
729	19	21	unvaccinate	unvacc		major city	never smoked	No	11 to 17	yes	self	self	1 (strongly disagree)	Does not oppose	1 (strongly disagree)	Does not oppose	1 (strongly disagree)	Does not oppose	1 (strongly disagree)	Does not oppose	4	neutral	neutral	complete	unvaccinated	self	93-92	School eligible	More dissadvantaged	Au	Both AU born
471	24	26	unvaccinate	unvacc	within last 2 yrs	regoinal and remote	ever smoker	No	11 to 17	none	self	self	1 (strongly disagree)	Does not oppose	1 (strongly disagree)	Does not oppose	4	neutral	4	neutral	4	neutral	oppose	complete	unvaccinated	self	89-88	Cath up eligible	More dissadvantaged	Au	One parent OS born	4+	both parents
1250	18	19		schoolvac		major city	never smoked	Yes			both parents	both parents	1 (strongly disagree)	Does not oppose	1 (strongly disagree)	Does not oppose	1 (strongly disagree)	Does not oppose	1 (strongly disagree)	Does not oppose	1 (strongly disagree)	Does not oppose	Does not oppose	complete	vaccinated	parents	96-94	School eligible	less dissadvantaged	Au	One parent OS born	None	both parents
491	21	24		schoolvac	within last 2 yrs	regoinal and remote	never smoked	No	18 to 24	yes	mum	mum	1 (strongly disagree)	Does not oppose	1 (strongly disagree)	Does not oppose	1 (strongly disagree)	Does not oppose	1 (strongly disagree)	Does not oppose	1 (strongly disagree)	Does not oppose	Does not oppose	complete	vaccinated	parents	91-90	School eligible	More dissadvantaged	Au	Both AU born	1-3 partners	both parents
16	21	24		schoolvac	within last 2 yrs	major city	never smoked	Yes	18 to 24	yes	mum	mum	1 (strongly disagree)	Does not oppose	1 (strongly disagree)	Does not oppose					3	neutral	Does not oppose	complete	vaccinated	parents	91-90	School eligible	less dissadvantaged	Au	Both AU born	4+	both parents
765	21	23		schoolvac		major city	never smoked	No	18 to 24	yes	both parents	both parents	1 (strongly disagree)	Does not oppose	1 (strongly disagree)	Does not oppose	1 (strongly disagree)	Does not oppose	1 (strongly disagree)	Does not oppose	1 (strongly disagree)	Does not oppose	Does not oppose	complete	vaccinated	parents	91-90	School eligible	less dissadvantaged	Au	One parent OS born	1-3 partners	Non religious
269	20	23		schoolvac		major city	ever smoker	Yes	18 to 24	yes	mum	mum	1 (strongly disagree)	Does not oppose	3	neutral	2	Does not oppose	5	neutral	4	neutral	Does not oppose	complete	vaccinated	parents	91-90	School eligible	less dissadvantaged	Au	Both AU born	1-3 partners	Non religious
96	22	25	GP		within last 2 yrs	major city	ever smoker	No	18 to 24	yes	self	self	1 (strongly disagree)	Does not oppose	1 (strongly disagree)	Does not oppose	1 (strongly disagree)	Does not oppose	1 (strongly disagree)	Does not oppose	2	Does not oppose	Does not oppose	complete	vaccinated	self	89-88	Cath up eligible	less dissadvantaged	Au	Both AU born	1-3 partners	both parents
643	23	25		schoolvac	within last 2 yrs	regoinal and remote	ever smoker	No	11 to 17	yes	self	self	1 (strongly disagree)	Does not oppose	1 (strongly disagree)	Does not oppose	1 (strongly disagree)	Does not oppose	1 (strongly disagree)	Does not oppose	1 (strongly disagree)	Does not oppose	Does not oppose	complete	vaccinated	self	89-88	School eligible	More dissadvantaged	Au	Both AU born	1-3 partners	Non religious
990	23	25		schoolvac	within last 2 yrs	major city		No	11 to 17	yes	both parents	both parents	1 (strongly disagree)	Does not oppose	1 (strongly disagree)	Does not oppose	1 (strongly disagree)	Does not oppose	1 (strongly disagree)	Does not oppose	1 (strongly disagree)	Does not oppose	Does not oppose	complete	vaccinated	parents	89-88	School eligible	less dissadvantaged	Au	Both AU born	1-3 partners	both parents
446	21	23		schoolvac	within last 2 yrs	regoinal and remote	never smoked	Yes	11 to 17	yes	mum	mum	1 (strongly disagree)	Does not oppose	1 (strongly disagree)	Does not oppose	2	Does not oppose	2	Does not oppose	2	Does not oppose	Does not oppose	complete	vaccinated	parents	91-90	School eligible	More dissadvantaged	Au	Both AU born	1-3 partners	both parents
780	20	22		schoolvac	within last 2 yrs	regoinal and remote	ever smoker	No	11 to 17	none	mum	mum	4	neutral	4	neutral	3	neutral	3	neutral	2	Does not oppose	Does not oppose	complete	vaccinated	parents	93-92	School eligible	More dissadvantaged	Au	Both AU born	4+	One parent
160	18	21		schoolvac		major city	never smoked	Yes			both parents	both parents	1 (strongly disagree)	Does not oppose	1 (strongly disagree)	Does not oppose	1 (strongly disagree)	Does not oppose	1 (strongly disagree)	Does not oppose	2	Does not oppose	neutral	complete	vaccinated	parents	93-92	School eligible	less dissadvantaged	Au	Both parents OS born	None	Non religious
585	23	25		schoolvac	within last 2 yrs	major city	never smoked	Yes	18 to 24	yes	mum	mum	1 (strongly disagree)	Does not oppose	1 (strongly disagree)	Does not oppose	1 (strongly disagree)	Does not oppose	1 (strongly disagree)	Does not oppose	1 (strongly disagree)	Does not oppose	Does not oppose	complete	vaccinated	parents	89-88	School eligible	less dissadvantaged	Au	Both AU born	1-3 partners	Non religious
314	20	23		schoolvac	within last 2 yrs	regoinal and remote	never smoked	No	11 to 17	yes	both parents	both parents	2	Does not oppose	4	neutral	3	neutral	5	neutral	2	Does not oppose	Does not oppose	complete	vaccinated	parents	91-90	School eligible	More dissadvantaged	Au	Both AU born	4+	Non religious
1069	22	23		schoolvac		major city	never smoked	Yes	18 to 24	yes	both parents	both parents	1 (strongly disagree)	Does not oppose	1 (strongly disagree)	Does not oppose	1 (strongly disagree)	Does not oppose	1 (strongly disagree)	Does not oppose	3	neutral	Does not oppose	complete	vaccinated	parents	91-90	School eligible	less dissadvantaged	Au	Both AU born	1-3 partners	Non religious
190	20	23		schoolvac	within last 2 yrs	major city	ever smoker	Yes	18 to 24	yes	mum	mum	1 (strongly disagree)	Does not oppose	1 (strongly disagree)	Does not oppose	1 (strongly disagree)	Does not oppose	1 (strongly disagree)	Does not oppose	5	neutral	neutral	complete	vaccinated	parents	91-90	School eligible	less dissadvantaged	Au	Both AU born	4+	both parents
852	25	26	GP		within last 2 yrs	regoinal and remote	never smoked	No	18 to 24	yes	self	self	1 (strongly disagree)	Does not oppose	1 (strongly disagree)	Does not oppose	1 (strongly disagree)	Does not oppose	1 (strongly disagree)	Does not oppose	4	neutral	neutral	complete	vaccinated	self	89-88	Cath up eligible	More dissadvantaged	Au	Both AU born	4+	Non religious
282	21	24		schoolvac	within last 2 yrs	major city	never smoked	No	18 to 24	yes	both parents	both parents	1 (strongly disagree)	Does not oppose	1 (strongly disagree)	Does not oppose	1 (strongly disagree)	Does not oppose	1 (strongly disagree)	Does not oppose	1 (strongly disagree)	Does not oppose	Does not oppose	complete	vaccinated	parents	91-90	School eligible	More dissadvantaged	Au	One parent OS born	1-3 partners	Non religious
931	21	22		schoolvac	within last 2 yrs	major city	never smoked	No	11 to 17	yes	mum	mum	1 (strongly disagree)	Does not oppose	1 (strongly disagree)	Does not oppose	1 (strongly disagree)	Does not oppose	1 (strongly disagree)	Does not oppose	2	Does not oppose	Does not oppose	complete	vaccinated	parents	93-92	School eligible	less dissadvantaged	Au	Both AU born	1-3 partners	both parents
1112	21	22		schoolvac		major city	never smoked	Yes	18 to 24	yes	self	self	1 (strongly disagree)	Does not oppose	1 (strongly disagree)	Does not oppose	1 (strongly disagree)	Does not oppose	1 (strongly disagree)	Does not oppose	1 (strongly disagree)	Does not oppose	Does not oppose	complete	vaccinated	self	93-92	School eligible	less dissadvantaged	Au	One parent OS born	1-3 partners	One parent
957	22	23		schoolvac	within last 2 yrs	regoinal and remote	never smoked	Yes	18 to 24	yes	mum	mum	1 (strongly disagree)	Does not oppose	1 (strongly disagree)	Does not oppose	1 (strongly disagree)	Does not oppose	1 (strongly disagree)	Does not oppose	1 (strongly disagree)	Does not oppose	Does not oppose	complete	vaccinated	parents	91-90	School eligible	less dissadvantaged	Au	Both AU born		both parents
136	20	23		schoolvac		major city	never smoked	Yes	11 to 17	yes	self	self	1 (strongly disagree)	Does not oppose	1 (strongly disagree)	Does not oppose	1 (strongly disagree)	Does not oppose	1 (strongly disagree)	Does not oppose	3	neutral	Does not oppose	complete	vaccinated	self	91-90	School eligible	less dissadvantaged	Au	Both AU born	1-3 partners	Non religious
374	24	26	GP			major city	never smoked	Yes	18 to 24	yes	self	self	1 (strongly disagree)	Does not oppose	1 (strongly disagree)	Does not oppose	1 (strongly disagree)	Does not oppose	1 (strongly disagree)	Does not oppose	1 (strongly disagree)	Does not oppose	Does not oppose	complete	vaccinated	self	89-88	Cath up eligible	less dissadvantaged	Au	Both AU born	1-3 partners	One parent
454	24	27	GP		within last 2 yrs	regoinal and remote	never smoked	Yes	11 to 17	yes	self	self	1 (strongly disagree)	Does not oppose	1 (strongly disagree)	Does not oppose	1 (strongly disagree)	Does not oppose	1 (strongly disagree)	Does not oppose	2	Does not oppose	Does not oppose	complete	vaccinated	self	87-86	Cath up eligible	More dissadvantaged	other	One parent OS born	4+	Non religious
849	23	24	GP		within last 2 yrs		never smoked	No	11 to 17	yes	self	self	1 (strongly disagree)	Does not oppose	1 (strongly disagree)	Does not oppose	1 (strongly disagree)	Does not oppose	1 (strongly disagree)	Does not oppose	1 (strongly disagree)	Does not oppose	Does not oppose	complete	vaccinated	self	91-90	School eligible		other	Both parents OS born	4+	Non religious
483	22	24	unvaccinate	unvacc	over 2 yrs	regoinal and remote	never smoked	No	18 to 24	none	self	self	4	neutral	3	neutral	4	neutral	4	neutral	4	neutral	Does not oppose	incomplete	unvaccinated	self	91-90	School eligible	More dissadvantaged	Au	One parent OS born	4+	Non religious
779	20	22		schoolvac		regoinal and remote	never smoked	No	11 to 17	yes	mum	mum	1 (strongly disagree)	Does not oppose	1 (strongly disagree)	Does not oppose	1 (strongly disagree)	Does not oppose	1 (strongly disagree)	Does not oppose	2	Does not oppose	Does not oppose	complete	vaccinated	parents	93-92	School eligible	More dissadvantaged	Au	Both AU born	4+	Non religious
841	23	24		schoolvac	over 2 yrs	regoinal and remote	never smoked	Yes	11 to 17	yes	mum	mum	1 (strongly disagree)	Does not oppose	1 (strongly disagree)	Does not oppose	1 (strongly disagree)	Does not oppose	1 (strongly disagree)	Does not oppose	1 (strongly disagree)	Does not oppose	Does not oppose	complete	vaccinated	parents	91-90	School eligible	less dissadvantaged	Au	Both AU born	4+	Non religious
809	23	25	unvaccinate	unvacc	within last 2 yrs	major city	never smoked	Yes	11 to 17	yes	mum	mum	2	Does not oppose	1 (strongly disagree)	Does not oppose	4	neutral	4	neutral	6	oppose	neutral	complete	unvaccinated	parents	89-88	School eligible	less dissadvantaged	Au	One parent OS born	4+	One parent
851	18	20		schoolvac	within last 2 yrs	regoinal and remote	never smoked	Yes	11 to 17	yes	both parents	both parents	1 (strongly disagree)	Does not oppose	1 (strongly disagree)	Does not oppose	1 (strongly disagree)	Does not oppose	1 (strongly disagree)	Does not oppose	2	Does not oppose	Does not oppose	complete	vaccinated	parents	96-94	School eligible	More dissadvantaged	Au	Both AU born	1-3 partners	Non religious
937	24	24		schoolvac	within last 2 yrs	major city	never smoked	Yes	11 to 17	yes	self	self	1 (strongly disagree)	Does not oppose	1 (strongly disagree)	Does not oppose	1 (strongly disagree)	Does not oppose	1 (strongly disagree)	Does not oppose	1 (strongly disagree)	Does not oppose	Does not oppose	complete	vaccinated	self	91-90	School eligible	less dissadvantaged	other	Both parents OS born	1-3 partners	both parents
1384	20	20		schoolvac		major city	never smoked	No			mum	mum	4	neutral	2	Does not oppose	2	Does not oppose	5	neutral	7 (strongly agree)	oppose	oppose	complete	vaccinated	parents	96-94	School eligible	More dissadvantaged	other	Both parents OS born	None	both parents
656	22	24		schoolvac	within last 2 yrs	regoinal and remote	never smoked	Yes	18 to 24	yes	both parents	both parents	1 (strongly disagree)	Does not oppose	1 (strongly disagree)	Does not oppose	1 (strongly disagree)	Does not oppose	1 (strongly disagree)	Does not oppose	2	Does not oppose	Does not oppose	complete	vaccinated	parents	91-90	School eligible	More dissadvantaged	other	Both parents OS born	1-3 partners	One parent
1282	23	24		schoolvac		major city	never smoked	No	18 to 24	yes	mum	mum	1 (strongly disagree)	Does not oppose	1 (strongly disagree)	Does not oppose	1 (strongly disagree)	Does not oppose	1 (strongly disagree)	Does not oppose	6	oppose	Does not oppose	complete	vaccinated	parents	91-90	School eligible	less dissadvantaged	Au	Both AU born	1-3 partners	both parents
869	20	22		schoolvac		regoinal and remote	never smoked	Yes			both parents	both parents	1 (strongly disagree)	Does not oppose	1 (strongly disagree)	Does not oppose	1 (strongly disagree)	Does not oppose	1 (strongly disagree)	Does not oppose	4	neutral	neutral	complete	vaccinated	parents	93-92	School eligible	less dissadvantaged	Au	Both AU born	None	Non religious
299	21	24		schoolvac	within last 2 yrs	major city	never smoked	Yes	11 to 17	yes	mum	mum	1 (strongly disagree)	Does not oppose	1 (strongly disagree)	Does not oppose	1 (strongly disagree)	Does not oppose	1 (strongly disagree)	Does not oppose	1 (strongly disagree)	Does not oppose	Does not oppose	complete	vaccinated	parents	91-90	School eligible	More dissadvantaged	Au	Both AU born	1-3 partners	both parents
1154	18	19		schoolvac		major city	never smoked	Yes			mum	mum	1 (strongly disagree)	Does not oppose	1 (strongly disagree)	Does not oppose	1 (strongly disagree)	Does not oppose	1 (strongly disagree)	Does not oppose	1 (strongly disagree)	Does not oppose	Does not oppose	complete	vaccinated	parents	96-94	School eligible	More dissadvantaged	Au	One parent OS born	None	both parents
1084	25	26	GP		over 2 yrs	major city	ever smoker	No	11 to 17	yes	both parents	both parents	1 (strongly disagree)	Does not oppose	1 (strongly disagree)	Does not oppose	1 (strongly disagree)	Does not oppose	1 (strongly disagree)	Does not oppose	2	Does not oppose	Does not oppose	complete	vaccinated	parents	89-88	Cath up eligible	less dissadvantaged	Au	Both AU born	4+	One parent
716	21	23		schoolvac		regoinal and remote	ever smoker	No	18 to 24	yes	both parents	both parents	1 (strongly disagree)	Does not oppose	1 (strongly disagree)	Does not oppose	1 (strongly disagree)	Does not oppose	2	Does not oppose	4	neutral	Does not oppose	complete	vaccinated	parents	91-90	School eligible	More dissadvantaged	Au	Both AU born	1-3 partners	Non religious
1172	23	24	unvaccinate	unvacc		regoinal and remote	never smoked	Yes	18 to 24	yes	self	self	1 (strongly disagree)	Does not oppose	1 (strongly disagree)	Does not oppose	1 (strongly disagree)	Does not oppose	1 (strongly disagree)	Does not oppose	1 (strongly disagree)	Does not oppose	Does not oppose	complete	unvaccinated	self	91-90	School eligible	less dissadvantaged	Au	One parent OS born	1-3 partners	Non religious
18	24	27	GP		within last 2 yrs	regoinal and remote	ever smoker	No	11 to 17	none	mum	mum	1 (strongly disagree)	Does not oppose	7 (strongly agree)	oppose	1 (strongly disagree)	Does not oppose	7 (strongly agree)	oppose	7 (strongly agree)	oppose	Does not oppose	complete	vaccinated	parents	87-86	Cath up eligible	More dissadvantaged	Au	Both AU born	4+	One parent
1269	19	19		schoolvac		regoinal and remote	never smoked	Yes	18 to 24	yes	both parents	both parents	1 (strongly disagree)	Does not oppose	1 (strongly disagree)	Does not oppose	1 (strongly disagree)	Does not oppose	1 (strongly disagree)	Does not oppose	1 (strongly disagree)	Does not oppose	Does not oppose	complete	vaccinated	parents	96-94	School eligible	More dissadvantaged	Au	One parent OS born	1-3 partners	Non religious
1331	21	21	unvaccinate	unvacc	over 2 yrs	major city	never smoked	Yes	18 to 24	yes	both parents	both parents	2	Does not oppose	1 (strongly disagree)	Does not oppose	2	Does not oppose	4	neutral	1 (strongly disagree)	Does not oppose	Does not oppose	complete	unvaccinated	parents	93-92	School eligible	less dissadvantaged	Au	Both AU born	1-3 partners	Non religious
634	20	23		schoolvac	within last 2 yrs	major city	never smoked	Yes	11 to 17	yes	self	self	1 (strongly disagree)	Does not oppose	1 (strongly disagree)	Does not oppose			1 (strongly disagree)	Does not oppose	3	neutral	Does not oppose	complete	vaccinated	self	91-90	School eligible	More dissadvantaged	Au	Both parents OS born	4+	both parents
881	21	23		schoolvac		regoinal and remote	never smoked	Yes	11 to 17	yes	both parents	both parents	1 (strongly disagree)	Does not oppose	1 (strongly disagree)	Does not oppose	1 (strongly disagree)	Does not oppose	1 (strongly disagree)	Does not oppose	3	neutral	Does not oppose	complete	vaccinated	parents	93-92	School eligible	More dissadvantaged	Au	Both AU born	1-3 partners	both parents
593	22	25		schoolvac	within last 2 yrs	regoinal and remote	never smoked	Yes	11 to 17	none	mum	mum	1 (strongly disagree)	Does not oppose	1 (strongly disagree)	Does not oppose	1 (strongly disagree)	Does not oppose	1 (strongly disagree)	Does not oppose	7 (strongly agree)	oppose	neutral	complete	vaccinated	parents	91-90	School eligible	More dissadvantaged	Au	Both AU born	4+	Non religious
515	25	27	GP		within last 2 yrs	regoinal and remote	never smoked	No	18 to 24	yes	both parents	both parents	1 (strongly disagree)	Does not oppose	1 (strongly disagree)	Does not oppose	1 (strongly disagree)	Does not oppose	1 (strongly disagree)	Does not oppose	4	neutral	neutral	complete	vaccinated	parents	87-86	Cath up eligible	More dissadvantaged	Au	Both AU born	1-3 partners	both parents
1281	23	24	unvaccinate	unvacc	within last 2 yrs	major city	never smoked	Yes	18 to 24	yes	mum	mum	1 (strongly disagree)	Does not oppose	1 (strongly disagree)	Does not oppose	3	neutral	3	neutral	6	oppose	oppose	complete	unvaccinated	parents	91-90	School eligible	less dissadvantaged	Au	Both AU born	4+	both parents
255	25	28	GP		within last 2 yrs	major city	ever smoker	Yes	11 to 17	yes	mum	mum	1 (strongly disagree)	Does not oppose	1 (strongly disagree)	Does not oppose	1 (strongly disagree)	Does not oppose	1 (strongly disagree)	Does not oppose	2	Does not oppose	Does not oppose	complete	vaccinated	parents	87-86	Cath up eligible	less dissadvantaged	other			both parents
1097	23	24	GP			major city	never smoked	Yes	18 to 24	yes	mum	mum	5	neutral	4	neutral	4	neutral	5	neutral	2	Does not oppose	neutral	complete	vaccinated	parents	91-90	School eligible	less dissadvantaged	Au	Both AU born	1-3 partners	One parent
1377	23	23	unvaccinate	unvacc		regoinal and remote	never smoked	No	18 to 24	yes	self	self	1 (strongly disagree)	Does not oppose	1 (strongly disagree)	Does not oppose	1 (strongly disagree)	Does not oppose	1 (strongly disagree)	Does not oppose	2	Does not oppose	Does not oppose	complete	unvaccinated	self	91-90	School eligible	More dissadvantaged	Au	Both AU born	1-3 partners	Non religious
251	22	25		schoolvac		major city	never smoked	Yes			self	self	1 (strongly disagree)	Does not oppose	1 (strongly disagree)	Does not oppose	1 (strongly disagree)	Does not oppose	1 (strongly disagree)	Does not oppose	2	Does not oppose	neutral	complete	vaccinated	self	89-88	School eligible	less dissadvantaged	Au	One parent OS born	None	Non religious
508	21	24		schoolvac	within last 2 yrs	regoinal and remote	never smoked	No	11 to 17	yes	self	self	1 (strongly disagree)	Does not oppose	1 (strongly disagree)	Does not oppose	1 (strongly disagree)	Does not oppose	1 (strongly disagree)	Does not oppose	2	Does not oppose	neutral	complete	vaccinated	self	91-90	School eligible	less dissadvantaged	Au	Both AU born	1-3 partners	One parent
850	22	24		schoolvac	within last 2 yrs	major city	never smoked	No	18 to 24	yes	self	self	1 (strongly disagree)	Does not oppose	1 (strongly disagree)	Does not oppose	1 (strongly disagree)	Does not oppose	1 (strongly disagree)	Does not oppose	2	Does not oppose	Does not oppose	complete	vaccinated	self	91-90	School eligible	less dissadvantaged	Au	Both AU born	1-3 partners	One parent
970	23	24		schoolvac	within last 2 yrs	major city	never smoked	No	11 to 17	yes	both parents	both parents	1 (strongly disagree)	Does not oppose	1 (strongly disagree)	Does not oppose	1 (strongly disagree)	Does not oppose	1 (strongly disagree)	Does not oppose	4	neutral	neutral	complete	vaccinated	parents	91-90	School eligible	less dissadvantaged	Au	One parent OS born	1-3 partners	both parents
1203	22	23	unvaccinate	unvacc			never smoked	No			mum	mum	1 (strongly disagree)	Does not oppose	1 (strongly disagree)	Does not oppose	1 (strongly disagree)	Does not oppose	1 (strongly disagree)	Does not oppose	1 (strongly disagree)	Does not oppose	neutral	complete	unvaccinated	parents	91-90	School eligible		other	Both parents OS born	None	both parents
303	22	25	GP		within last 2 yrs	regoinal and remote	never smoked	Yes	11 to 17	yes	both parents	both parents	1 (strongly disagree)	Does not oppose	1 (strongly disagree)	Does not oppose	1 (strongly disagree)	Does not oppose	1 (strongly disagree)	Does not oppose	4	neutral	neutral	complete	vaccinated	parents	91-90	School eligible	less dissadvantaged	Au	Both AU born	1-3 partners	One parent
1266	22	23	unvaccinate	unvacc			never smoked	No	18 to 24	yes	self	self	1 (strongly disagree)	Does not oppose	3	neutral	3	neutral	4	neutral	2	Does not oppose	Does not oppose	complete	unvaccinated	self	91-90	School eligible		other	Both parents OS born	4+	both parents
100	21	24		schoolvac		major city	never smoked	Yes	18 to 24	yes	self	self	1 (strongly disagree)	Does not oppose	1 (strongly disagree)	Does not oppose	1 (strongly disagree)	Does not oppose	1 (strongly disagree)	Does not oppose	4	neutral	neutral	complete	vaccinated	self	91-90	School eligible	less dissadvantaged	Au	One parent OS born	1-3 partners	both parents
1246	22	23		schoolvac	within last 2 yrs	major city	never smoked	No	11 to 17	yes	mum	mum	1 (strongly disagree)	Does not oppose	1 (strongly disagree)	Does not oppose	1 (strongly disagree)	Does not oppose	1 (strongly disagree)	Does not oppose	4	neutral	Does not oppose	complete	vaccinated	parents	91-90	School eligible	less dissadvantaged	other	Both parents OS born	4+	both parents
1201	24	25		schoolvac	within last 2 yrs	regoinal and remote	never smoked	Yes	11 to 17	yes	both parents	both parents	1 (strongly disagree)	Does not oppose	1 (strongly disagree)	Does not oppose	1 (strongly disagree)	Does not oppose	1 (strongly disagree)	Does not oppose	1 (strongly disagree)	Does not oppose	Does not oppose	complete	vaccinated	parents	89-88	School eligible	More dissadvantaged	Au	One parent OS born	4+	both parents
1304	24	24	GP		within last 2 yrs	major city	ever smoker	No	11 to 17	yes	mum	mum	1 (strongly disagree)	Does not oppose	1 (strongly disagree)	Does not oppose	5	neutral	4	neutral	4	neutral	Does not oppose	complete	vaccinated	parents	91-90	School eligible	less dissadvantaged	Au	Both AU born	4+	One parent
402	19	21	unvaccinate	unvacc		regoinal and remote	never smoked	Yes			both parents	both parents	1 (strongly disagree)	Does not oppose	1 (strongly disagree)	Does not oppose	1 (strongly disagree)	Does not oppose	1 (strongly disagree)	Does not oppose	1 (strongly disagree)	Does not oppose	Does not oppose	complete	unvaccinated	parents	93-92	School eligible	More dissadvantaged	Au	Both AU born	None	both parents
530	21	24		schoolvac			ever smoker	Yes	18 to 24	yes	self	self	1 (strongly disagree)	Does not oppose	1 (strongly disagree)	Does not oppose	1 (strongly disagree)	Does not oppose	1 (strongly disagree)	Does not oppose	1 (strongly disagree)	Does not oppose	Does not oppose	complete	vaccinated	self	91-90	School eligible		other	Both parents OS born	4+	One parent
1302	18	18	unvaccinate	unvacc		major city	never smoked	No			mum	mum	1 (strongly disagree)	Does not oppose	1 (strongly disagree)	Does not oppose	1 (strongly disagree)	Does not oppose	1 (strongly disagree)	Does not oppose	1 (strongly disagree)	Does not oppose	neutral	incomplete	unvaccinated	parents	96-94	School eligible	More dissadvantaged	Au	Both AU born	None	One parent
341	19	22		schoolvac		major city	never smoked	Yes	11 to 17	yes	mum	mum	1 (strongly disagree)	Does not oppose	1 (strongly disagree)	Does not oppose	1 (strongly disagree)	Does not oppose	1 (strongly disagree)	Does not oppose	1 (strongly disagree)	Does not oppose	Does not oppose	complete	vaccinated	parents	93-92	School eligible	less dissadvantaged	Au	Both AU born	1-3 partners	both parents
744	21	23		schoolvac		regoinal and remote	never smoked	No	11 to 17	yes	both parents	both parents	1 (strongly disagree)	Does not oppose	1 (strongly disagree)	Does not oppose	1 (strongly disagree)	Does not oppose	1 (strongly disagree)	Does not oppose	1 (strongly disagree)	Does not oppose	Does not oppose	complete	vaccinated	parents	91-90	School eligible	More dissadvantaged	Au	Both AU born	1-3 partners	One parent
582	25	27	GP		within last 2 yrs	major city	never smoked	Yes	18 to 24	yes	self	self	1 (strongly disagree)	Does not oppose	1 (strongly disagree)	Does not oppose	1 (strongly disagree)	Does not oppose	1 (strongly disagree)	Does not oppose	1 (strongly disagree)	Does not oppose	Does not oppose	complete	vaccinated	self	87-86	Cath up eligible	less dissadvantaged	Au	Both AU born	1-3 partners	both parents
696	25	27	unvaccinate	unvacc	within last 2 yrs	major city	ever smoker	No	11 to 17	none	self	self	1 (strongly disagree)	Does not oppose	1 (strongly disagree)	Does not oppose	1 (strongly disagree)	Does not oppose	1 (strongly disagree)	Does not oppose	1 (strongly disagree)	Does not oppose	Does not oppose	complete	unvaccinated	self	87-86	Cath up eligible	less dissadvantaged	Au	Both AU born	4+	One parent
1213	21	22		schoolvac	within last 2 yrs	major city	never smoked	Yes	18 to 24	yes	self	self	1 (strongly disagree)	Does not oppose	1 (strongly disagree)	Does not oppose	1 (strongly disagree)	Does not oppose	1 (strongly disagree)	Does not oppose	1 (strongly disagree)	Does not oppose	Does not oppose	complete	vaccinated	self	93-92	School eligible	less dissadvantaged	Au	Both AU born	1-3 partners	Non religious
1344	24	25		schoolvac		major city	never smoked	No	18 to 24	yes	self	self	1 (strongly disagree)	Does not oppose	1 (strongly disagree)	Does not oppose	1 (strongly disagree)	Does not oppose	1 (strongly disagree)	Does not oppose	1 (strongly disagree)	Does not oppose	Does not oppose	complete	vaccinated	self	89-88	School eligible	less dissadvantaged	other	Both parents OS born	1-3 partners	Non religious
1030	22	23	GP		within last 2 yrs	regoinal and remote	never smoked	No	11 to 17	yes	mum	mum	1 (strongly disagree)	Does not oppose	1 (strongly disagree)	Does not oppose	1 (strongly disagree)	Does not oppose	1 (strongly disagree)	Does not oppose	1 (strongly disagree)	Does not oppose	neutral	complete	vaccinated	parents	91-90	School eligible	More dissadvantaged	Au	Both AU born	4+	Non religious
958	24	25	GP		within last 2 yrs	regoinal and remote	never smoked	Yes	18 to 24	yes	self	self	1 (strongly disagree)	Does not oppose	1 (strongly disagree)	Does not oppose	1 (strongly disagree)	Does not oppose	1 (strongly disagree)	Does not oppose	1 (strongly disagree)	Does not oppose	Does not oppose	complete	vaccinated	self	89-88	School eligible	More dissadvantaged	Au	Both AU born	1-3 partners	Non religious
704	25	27	GP		within last 2 yrs	major city	ever smoker	No	11 to 17	yes	self	self	1 (strongly disagree)	Does not oppose	1 (strongly disagree)	Does not oppose	1 (strongly disagree)	Does not oppose	1 (strongly disagree)	Does not oppose	3	neutral	neutral	incomplete	vaccinated	self	87-86	Cath up eligible	less dissadvantaged	other	Both parents OS born	4+	both parents
285	25	27	GP		within last 2 yrs	major city	never smoked	No	18 to 24	yes	self	self	1 (strongly disagree)	Does not oppose	1 (strongly disagree)	Does not oppose	1 (strongly disagree)	Does not oppose	1 (strongly disagree)	Does not oppose	2	Does not oppose	Does not oppose	complete	vaccinated	self	87-86	Cath up eligible	More dissadvantaged	Au	One parent OS born	1-3 partners	both parents
452	19	21		schoolvac			never smoked	No			self	self	1 (strongly disagree)	Does not oppose	1 (strongly disagree)	Does not oppose	1 (strongly disagree)	Does not oppose	1 (strongly disagree)	Does not oppose	3	neutral	neutral	complete	vaccinated	self	93-92	School eligible		other		None	One parent
787	25	27	GP			regoinal and remote	never smoked	Yes			self	self	1 (strongly disagree)	Does not oppose	1 (strongly disagree)	Does not oppose	1 (strongly disagree)	Does not oppose	1 (strongly disagree)	Does not oppose	1 (strongly disagree)	Does not oppose	Does not oppose	complete	vaccinated	self	87-86	Cath up eligible	less dissadvantaged	Au	Both AU born	None	One parent
151	25	28	GP		within last 2 yrs	major city	never smoked	Yes	11 to 17	yes	mum	mum	1 (strongly disagree)	Does not oppose	1 (strongly disagree)	Does not oppose	1 (strongly disagree)	Does not oppose	1 (strongly disagree)	Does not oppose	2	Does not oppose	Does not oppose	complete	vaccinated	parents	87-86	Cath up eligible	less dissadvantaged	Au	Both parents OS born	4+	both parents
1249	18	19		schoolvac			never smoked	Yes			mum	mum	2	Does not oppose	1 (strongly disagree)	Does not oppose	2	Does not oppose	1 (strongly disagree)	Does not oppose	1 (strongly disagree)	Does not oppose	Does not oppose	complete	vaccinated	parents	96-94	School eligible		other	Both parents OS born	None	One parent
437	22	24		schoolvac	within last 2 yrs		never smoked	Yes	18 to 24	yes	both parents	both parents	1 (strongly disagree)	Does not oppose	1 (strongly disagree)	Does not oppose	1 (strongly disagree)	Does not oppose	1 (strongly disagree)	Does not oppose	1 (strongly disagree)	Does not oppose	Does not oppose	complete	vaccinated	parents	91-90	School eligible		Au	Both AU born	1-3 partners	both parents
1375	25	25		schoolvac	within last 2 yrs	major city	never smoked	Yes	18 to 24	yes	mum	mum	1 (strongly disagree)	Does not oppose	1 (strongly disagree)	Does not oppose					2	Does not oppose		complete	vaccinated	parents	89-88	School eligible	less dissadvantaged	Au	Both AU born	4+	both parents
345	19	21		schoolvac		regoinal and remote	never smoked	Yes			mum	mum	1 (strongly disagree)	Does not oppose	1 (strongly disagree)	Does not oppose	1 (strongly disagree)	Does not oppose	1 (strongly disagree)	Does not oppose	1 (strongly disagree)	Does not oppose	Does not oppose	complete	vaccinated	parents	93-92	School eligible	More dissadvantaged	Au	Both AU born	None	both parents
97	20	24		schoolvac		major city	never smoked	Yes	18 to 24	yes	mum	mum	1 (strongly disagree)	Does not oppose	1 (strongly disagree)	Does not oppose	1 (strongly disagree)	Does not oppose	1 (strongly disagree)	Does not oppose	4	neutral	oppose	complete	vaccinated	parents	91-90	School eligible	less dissadvantaged	Au	Both AU born	4+	Non religious
435	20	23		schoolvac	within last 2 yrs		never smoked	No	11 to 17	yes	self	self	1 (strongly disagree)	Does not oppose	1 (strongly disagree)	Does not oppose	1 (strongly disagree)	Does not oppose	1 (strongly disagree)	Does not oppose	3	neutral	Does not oppose	complete	vaccinated	self	91-90	School eligible		other	One parent OS born	4+	Non religious
571	25	27	GP		within last 2 yrs	major city	never smoked	No	18 to 24	none	self	self	1 (strongly disagree)	Does not oppose	1 (strongly disagree)	Does not oppose	1 (strongly disagree)	Does not oppose	1 (strongly disagree)	Does not oppose	1 (strongly disagree)	Does not oppose	neutral	complete	vaccinated	self	87-86	Cath up eligible	More dissadvantaged	Au	Both AU born	1-3 partners	Non religious
1137	18	19		schoolvac		major city	never smoked	Yes			mum	mum	1 (strongly disagree)	Does not oppose	1 (strongly disagree)	Does not oppose	1 (strongly disagree)	Does not oppose	1 (strongly disagree)	Does not oppose	1 (strongly disagree)	Does not oppose	Does not oppose	complete	vaccinated	parents	96-94	School eligible	More dissadvantaged	Au	Both AU born	None	both parents
209	24	27	GP		within last 2 yrs	major city		Yes	11 to 17	yes	mum	mum	1 (strongly disagree)	Does not oppose	1 (strongly disagree)	Does not oppose	1 (strongly disagree)	Does not oppose	1 (strongly disagree)	Does not oppose	2	Does not oppose	Does not oppose	complete	vaccinated	parents	87-86	Cath up eligible	less dissadvantaged	Au	Both AU born	4+	both parents
983	19	20		schoolvac	within last 2 yrs	major city		Yes	11 to 17	none	self	self	5	neutral	3	neutral	2	Does not oppose	4	neutral	2	Does not oppose	Does not oppose	complete	vaccinated	self	96-94	School eligible	less dissadvantaged	other	One parent OS born	1-3 partners	One parent
637	25	27	GP		within last 2 yrs	major city	never smoked	Yes	18 to 24	none	mum	mum	1 (strongly disagree)	Does not oppose	1 (strongly disagree)	Does not oppose	1 (strongly disagree)	Does not oppose	1 (strongly disagree)	Does not oppose	4	neutral	Does not oppose	complete	vaccinated	parents	87-86	Cath up eligible	less dissadvantaged	Au	One parent OS born	1-3 partners	both parents
346	18	21		schoolvac		regoinal and remote	ever smoker	Yes			both parents	both parents	1 (strongly disagree)	Does not oppose	1 (strongly disagree)	Does not oppose	1 (strongly disagree)	Does not oppose	1 (strongly disagree)	Does not oppose	2	Does not oppose	Does not oppose	complete	vaccinated	parents	93-92	School eligible	More dissadvantaged	Au	Both AU born	None	both parents
1020	23	24		schoolvac	within last 2 yrs		ever smoker	No	11 to 17	yes	self	self	1 (strongly disagree)	Does not oppose	1 (strongly disagree)	Does not oppose	1 (strongly disagree)	Does not oppose	1 (strongly disagree)	Does not oppose	5	neutral	Does not oppose	complete	vaccinated	self	91-90	School eligible		Au	Both AU born	4+	Non religious
1391	22	23	unvaccinate	unvacc	within last 2 yrs	major city	ever smoker	No	18 to 24	yes	mum	mum	1 (strongly disagree)	Does not oppose	1 (strongly disagree)	Does not oppose	1 (strongly disagree)	Does not oppose	1 (strongly disagree)	Does not oppose	1 (strongly disagree)	Does not oppose	Does not oppose	complete	unvaccinated	parents	91-90	School eligible	More dissadvantaged	Au		4+	One parent
718	18	20		schoolvac		major city	never smoked	Yes			mum	mum	1 (strongly disagree)	Does not oppose	1 (strongly disagree)	Does not oppose	1 (strongly disagree)	Does not oppose	1 (strongly disagree)	Does not oppose	2	Does not oppose	Does not oppose	complete	vaccinated	parents	96-94	School eligible	less dissadvantaged	Au	One parent OS born	None	One parent
1116	18	19		schoolvac		major city	never smoked	No	11 to 17	yes	mum	mum	1 (strongly disagree)	Does not oppose	1 (strongly disagree)	Does not oppose	1 (strongly disagree)	Does not oppose	1 (strongly disagree)	Does not oppose	2	Does not oppose	Does not oppose	complete	vaccinated	parents	96-94	School eligible	less dissadvantaged	Au	Both AU born	1-3 partners	both parents
297	22	25		schoolvac	within last 2 yrs	regoinal and remote	never smoked	Yes	18 to 24	yes	both parents	both parents	1 (strongly disagree)	Does not oppose	1 (strongly disagree)	Does not oppose	1 (strongly disagree)	Does not oppose	1 (strongly disagree)	Does not oppose	1 (strongly disagree)	Does not oppose	Does not oppose	complete	vaccinated	parents	89-88	School eligible	less dissadvantaged	Au	Both AU born	4+	both parents
170	20	23		schoolvac	within last 2 yrs	regoinal and remote	never smoked	No	11 to 17	yes	mum	mum	6	oppose	5	neutral	6	oppose	6	oppose	1 (strongly disagree)	Does not oppose	Does not oppose	complete	vaccinated	parents	91-90	School eligible	More dissadvantaged	Au	Both AU born	1-3 partners	Non religious
1045	24	25		schoolvac		major city	never smoked	Yes			mum	mum	2	Does not oppose	2	Does not oppose	2	Does not oppose	2	Does not oppose	2	Does not oppose	Does not oppose	complete	vaccinated	parents	91-90	School eligible	less dissadvantaged	Au	Both AU born	None	both parents
201	23	26	GP		within last 2 yrs	major city	never smoked	No	11 to 17	yes	self	self	1 (strongly disagree)	Does not oppose	1 (strongly disagree)	Does not oppose	1 (strongly disagree)	Does not oppose	1 (strongly disagree)	Does not oppose	3	neutral	neutral	complete	vaccinated	self	89-88	Cath up eligible	less dissadvantaged	Au	Both AU born	4+	One parent
1100	23	24	GP		within last 2 yrs	major city	ever smoker	Yes	18 to 24	yes	mum	mum	1 (strongly disagree)	Does not oppose	1 (strongly disagree)	Does not oppose	1 (strongly disagree)	Does not oppose	1 (strongly disagree)	Does not oppose	1 (strongly disagree)	Does not oppose	Does not oppose	complete	vaccinated	parents	91-90	School eligible	less dissadvantaged	Au	Both AU born	4+	both parents
101	18	21	GP			major city	never smoked	Yes	11 to 17	yes	self	self	1 (strongly disagree)	Does not oppose	1 (strongly disagree)	Does not oppose	1 (strongly disagree)	Does not oppose	1 (strongly disagree)	Does not oppose	2	Does not oppose	neutral	complete	vaccinated	self	93-92	School eligible	less dissadvantaged	Au	Both AU born	1-3 partners	Non religious
1349	22	23		schoolvac			never smoked	Yes	18 to 24	none	self	self	2	Does not oppose	1 (strongly disagree)	Does not oppose	2	Does not oppose	1 (strongly disagree)	Does not oppose	2	Does not oppose	Does not oppose	complete	vaccinated	self	91-90	School eligible		other	Both parents OS born	1-3 partners	One parent
102	20	24		schoolvac		regoinal and remote	never smoked	Yes			both parents	both parents	1 (strongly disagree)	Does not oppose	1 (strongly disagree)	Does not oppose	1 (strongly disagree)	Does not oppose	1 (strongly disagree)	Does not oppose	1 (strongly disagree)	Does not oppose	Does not oppose	complete	vaccinated	parents	91-90	School eligible	More dissadvantaged	Au	Both AU born	None	both parents
1145	24	25		schoolvac	within last 2 yrs	regoinal and remote	never smoked	No	11 to 17	none	self	self	2	Does not oppose	1 (strongly disagree)	Does not oppose	1 (strongly disagree)	Does not oppose	1 (strongly disagree)	Does not oppose	1 (strongly disagree)	Does not oppose	Does not oppose	incomplete	vaccinated	self	89-88	School eligible	More dissadvantaged	Au	Both AU born	4+	Non religious
1339	21	22		schoolvac			never smoked	No	18 to 24	yes	mum	mum	1 (strongly disagree)	Does not oppose	1 (strongly disagree)	Does not oppose	1 (strongly disagree)	Does not oppose	1 (strongly disagree)	Does not oppose	1 (strongly disagree)	Does not oppose	Does not oppose	complete	vaccinated	parents	93-92	School eligible		Au	Both AU born	1-3 partners	both parents
439	22	25		schoolvac		major city	never smoked	Yes			self	self	1 (strongly disagree)	Does not oppose	1 (strongly disagree)	Does not oppose	1 (strongly disagree)	Does not oppose	1 (strongly disagree)	Does not oppose	2	Does not oppose	Does not oppose	complete	vaccinated	self	89-88	School eligible	less dissadvantaged	Au	One parent OS born	None	both parents
383	23	26	GP		within last 2 yrs	major city	never smoked	Yes	18 to 24	yes	mum	mum	1 (strongly disagree)	Does not oppose	1 (strongly disagree)	Does not oppose	1 (strongly disagree)	Does not oppose	1 (strongly disagree)	Does not oppose	4	neutral	neutral	complete	vaccinated	parents	89-88	Cath up eligible	less dissadvantaged	Au	Both AU born	1-3 partners	both parents
610	21	23		schoolvac			never smoked	No			both parents	both parents	1 (strongly disagree)	Does not oppose	1 (strongly disagree)	Does not oppose	2	Does not oppose	3	neutral	2	Does not oppose	Does not oppose	complete	vaccinated	parents	91-90	School eligible		Au	One parent OS born	None	both parents
29	21	25	GP		within last 2 yrs	major city	never smoked	Yes	11 to 17	yes	self	self	1 (strongly disagree)	Does not oppose	1 (strongly disagree)	Does not oppose	1 (strongly disagree)	Does not oppose	1 (strongly disagree)	Does not oppose	3	neutral	Does not oppose	complete	vaccinated	self	89-88	School eligible	less dissadvantaged	other		4+	Non religious
223	23	26	GP		within last 2 yrs	major city	never smoked	No	18 to 24	yes	self	self	1 (strongly disagree)	Does not oppose	1 (strongly disagree)	Does not oppose	1 (strongly disagree)	Does not oppose	1 (strongly disagree)	Does not oppose	1 (strongly disagree)	Does not oppose	Does not oppose	complete	vaccinated	self	89-88	Cath up eligible	less dissadvantaged	Au	Both AU born	4+	both parents
482	23	26	GP		within last 2 yrs	regoinal and remote	never smoked	No	18 to 24	yes	both parents	both parents	1 (strongly disagree)	Does not oppose	1 (strongly disagree)	Does not oppose	1 (strongly disagree)	Does not oppose	1 (strongly disagree)	Does not oppose	3	neutral	Does not oppose	complete	vaccinated	parents	89-88	Cath up eligible	More dissadvantaged	Au	One parent OS born	4+	One parent
1404	21	21	unvaccinate	unvacc		major city	never smoked	No	18 to 24	yes	mum	mum	1 (strongly disagree)	Does not oppose	1 (strongly disagree)	Does not oppose	1 (strongly disagree)	Does not oppose	1 (strongly disagree)	Does not oppose	1 (strongly disagree)	Does not oppose	Does not oppose	complete	unvaccinated	parents	93-92	School eligible	less dissadvantaged	Au	Both AU born	1-3 partners	both parents
486	20	23		schoolvac		major city	never smoked	No	18 to 24	yes	both parents	both parents	1 (strongly disagree)	Does not oppose	1 (strongly disagree)	Does not oppose	1 (strongly disagree)	Does not oppose	1 (strongly disagree)	Does not oppose	4	neutral	neutral	complete	vaccinated	parents	91-90	School eligible	less dissadvantaged	Au	One parent OS born	4+	One parent
1312	23	23	GP		within last 2 yrs	major city	never smoked	No	18 to 24	yes	self	self	1 (strongly disagree)	Does not oppose	1 (strongly disagree)	Does not oppose	1 (strongly disagree)	Does not oppose	1 (strongly disagree)	Does not oppose	1 (strongly disagree)	Does not oppose	neutral	complete	vaccinated	self	91-90	School eligible	More dissadvantaged	Au	Both AU born	1-3 partners	One parent
1243	25	26	unvaccinate	unvacc	within last 2 yrs		ever smoker	No	11 to 17	yes	self	self	1 (strongly disagree)	Does not oppose	1 (strongly disagree)	Does not oppose	1 (strongly disagree)	Does not oppose	1 (strongly disagree)	Does not oppose	4	neutral	Does not oppose	incomplete	unvaccinated	self	89-88	Cath up eligible		Au	Both AU born	4+	both parents
1311	24	25		schoolvac	within last 2 yrs		never smoked	No	11 to 17	yes	both parents	both parents	1 (strongly disagree)	Does not oppose	1 (strongly disagree)	Does not oppose	1 (strongly disagree)	Does not oppose	1 (strongly disagree)	Does not oppose	1 (strongly disagree)	Does not oppose	Does not oppose	complete	vaccinated	parents	89-88	School eligible		Au	Both parents OS born	4+	both parents
468	19	21		schoolvac		major city	ever smoker	Yes	18 to 24	yes	self	self	1 (strongly disagree)	Does not oppose	1 (strongly disagree)	Does not oppose	1 (strongly disagree)	Does not oppose	1 (strongly disagree)	Does not oppose	1 (strongly disagree)	Does not oppose	Does not oppose	complete	vaccinated	self	93-92	School eligible	More dissadvantaged	Au	Both parents OS born	4+	both parents
295	19	22	unvaccinate	unvacc			never smoked	Yes	11 to 17	yes	both parents	both parents	2	Does not oppose	2	Does not oppose	2	Does not oppose	2	Does not oppose	2	Does not oppose	neutral	complete	unvaccinated	parents	93-92	School eligible		other	Both parents OS born	1-3 partners	both parents
1080	19	20		schoolvac		major city	never smoked	Yes	18 to 24	yes	mum	mum	1 (strongly disagree)	Does not oppose	1 (strongly disagree)	Does not oppose	1 (strongly disagree)	Does not oppose	1 (strongly disagree)	Does not oppose	1 (strongly disagree)	Does not oppose	Does not oppose	complete	vaccinated	parents	96-94	School eligible	less dissadvantaged	Au	Both AU born	1-3 partners	One parent
277	25	27	GP		within last 2 yrs	regoinal and remote	ever smoker	No	11 to 17	yes	self	self	1 (strongly disagree)	Does not oppose	1 (strongly disagree)	Does not oppose	1 (strongly disagree)	Does not oppose	1 (strongly disagree)	Does not oppose	4	neutral	Does not oppose	complete	vaccinated	self	87-86	Cath up eligible	More dissadvantaged	Au	Both AU born		both parents
864	20	22		schoolvac	over 2 yrs	major city	ever smoker	Yes	11 to 17	none	self	self	1 (strongly disagree)	Does not oppose	1 (strongly disagree)	Does not oppose	1 (strongly disagree)	Does not oppose	1 (strongly disagree)	Does not oppose	2	Does not oppose	Does not oppose	incomplete	vaccinated	self	93-92	School eligible	less dissadvantaged	Au	Both parents OS born	4+	Non religious
258	24	27	GP		within last 2 yrs	regoinal and remote	never smoked	Yes	11 to 17	yes	self	self	1 (strongly disagree)	Does not oppose	1 (strongly disagree)	Does not oppose	1 (strongly disagree)	Does not oppose	1 (strongly disagree)	Does not oppose	5	neutral	neutral	complete	vaccinated	self	87-86	Cath up eligible	less dissadvantaged		Both AU born	4+	both parents
786	21	23		schoolvac		major city	never smoked	Yes			both parents	both parents	1 (strongly disagree)	Does not oppose	1 (strongly disagree)	Does not oppose	1 (strongly disagree)	Does not oppose	1 (strongly disagree)	Does not oppose	3	neutral	neutral	complete	vaccinated	parents	91-90	School eligible	less dissadvantaged	Au	Both parents OS born	None	One parent
1378	20	21		schoolvac	within last 2 yrs	major city		No	18 to 24	yes	both parents	both parents	1 (strongly disagree)	Does not oppose	1 (strongly disagree)	Does not oppose	1 (strongly disagree)	Does not oppose	1 (strongly disagree)	Does not oppose	3	neutral	Does not oppose	complete	vaccinated	parents	93-92	School eligible	less dissadvantaged	Au	One parent OS born	1-3 partners	One parent
655	23	25		schoolvac	within last 2 yrs	regoinal and remote	never smoked	No	18 to 24	yes	self	self	1 (strongly disagree)	Does not oppose	1 (strongly disagree)	Does not oppose	1 (strongly disagree)	Does not oppose	1 (strongly disagree)	Does not oppose	2	Does not oppose	Does not oppose	complete	vaccinated	self	89-88	School eligible	More dissadvantaged	Au	Both AU born	1-3 partners	Non religious
431	19	22		schoolvac	within last 2 yrs	regoinal and remote	never smoked	Yes	18 to 24	yes	mum	mum	2	Does not oppose	2	Does not oppose	2	Does not oppose	2	Does not oppose	2	Does not oppose	Does not oppose	complete	vaccinated	parents	93-92	School eligible	More dissadvantaged	Au	Both AU born	4+	both parents
1180	20	21		schoolvac		major city	never smoked	No			both parents	both parents	1 (strongly disagree)	Does not oppose	1 (strongly disagree)	Does not oppose	1 (strongly disagree)	Does not oppose	1 (strongly disagree)	Does not oppose	3	neutral	Does not oppose	complete	vaccinated	parents	93-92	School eligible	More dissadvantaged	Au	Both AU born	None	both parents
273	20	23		schoolvac		major city	never smoked	No			both parents	both parents	1 (strongly disagree)	Does not oppose	1 (strongly disagree)	Does not oppose	1 (strongly disagree)	Does not oppose	1 (strongly disagree)	Does not oppose	1 (strongly disagree)	Does not oppose	Does not oppose	complete	vaccinated	parents	91-90	School eligible	less dissadvantaged	Au	Both AU born	None	Non religious
143	25	28	GP		over 2 yrs	regoinal and remote	never smoked	No	11 to 17	yes	self	self	4	neutral	3	neutral	1 (strongly disagree)	Does not oppose	5	neutral	4	neutral	Does not oppose	complete	vaccinated	self	87-86	Cath up eligible	More dissadvantaged	Au	Both AU born	4+	both parents
1126	18	19		schoolvac		major city	never smoked	Yes	11 to 17	none	self	self	1 (strongly disagree)	Does not oppose	1 (strongly disagree)	Does not oppose	1 (strongly disagree)	Does not oppose	1 (strongly disagree)	Does not oppose	2	Does not oppose	Does not oppose	complete	vaccinated	self	96-94	School eligible	less dissadvantaged	Au	Both AU born	1-3 partners	One parent
760	19	21		schoolvac		major city	never smoked	Yes			both parents	both parents	1 (strongly disagree)	Does not oppose	1 (strongly disagree)	Does not oppose	1 (strongly disagree)	Does not oppose	1 (strongly disagree)	Does not oppose	4	neutral	Does not oppose	complete	vaccinated	parents	96-94	School eligible	less dissadvantaged	Au	Both parents OS born	None	One parent
1192	25	26	GP		within last 2 yrs	major city	never smoked	Yes	18 to 24	yes	self	self	1 (strongly disagree)	Does not oppose	1 (strongly disagree)	Does not oppose	1 (strongly disagree)	Does not oppose	1 (strongly disagree)	Does not oppose	1 (strongly disagree)	Does not oppose	Does not oppose	complete	vaccinated	self	89-88	Cath up eligible	less dissadvantaged	Au	Both AU born	1-3 partners	both parents
645	24	26	GP		over 2 yrs	major city	never smoked	Yes	11 to 17	yes	self	self	1 (strongly disagree)	Does not oppose	1 (strongly disagree)	Does not oppose	1 (strongly disagree)	Does not oppose	1 (strongly disagree)	Does not oppose	4	neutral	neutral	complete	vaccinated	self	89-88	Cath up eligible	less dissadvantaged	Au	One parent OS born	4+	both parents
516	22	25		schoolvac	within last 2 yrs	regoinal and remote	never smoked	Yes	11 to 17	yes	mum	mum	1 (strongly disagree)	Does not oppose	1 (strongly disagree)	Does not oppose	1 (strongly disagree)	Does not oppose	1 (strongly disagree)	Does not oppose	1 (strongly disagree)	Does not oppose	Does not oppose	complete	vaccinated	parents	89-88	School eligible	More dissadvantaged	Au	Both AU born	1-3 partners	both parents
1348	25	25		schoolvac		major city	never smoked	Yes	18 to 24	yes	mum	mum	1 (strongly disagree)	Does not oppose	1 (strongly disagree)	Does not oppose	1 (strongly disagree)	Does not oppose	1 (strongly disagree)	Does not oppose	5	neutral	neutral	complete	vaccinated	parents	89-88	School eligible	less dissadvantaged	Au	Both AU born	1-3 partners	One parent
432	19	22		schoolvac	within last 2 yrs	regoinal and remote	never smoked	Yes	11 to 17	yes	both parents	both parents	1 (strongly disagree)	Does not oppose	1 (strongly disagree)	Does not oppose	1 (strongly disagree)	Does not oppose	1 (strongly disagree)	Does not oppose	1 (strongly disagree)	Does not oppose	Does not oppose	complete	vaccinated	parents	93-92	School eligible	More dissadvantaged	Au	Both AU born	1-3 partners	Non religious
1050	24	25		schoolvac		regoinal and remote	never smoked	Yes			both parents	both parents	1 (strongly disagree)	Does not oppose	1 (strongly disagree)	Does not oppose	1 (strongly disagree)	Does not oppose	1 (strongly disagree)	Does not oppose	1 (strongly disagree)	Does not oppose	neutral	complete	vaccinated	parents	89-88	School eligible	More dissadvantaged	Au	Both AU born	None	both parents
1027	23	24		schoolvac			ever smoker	No	11 to 17	yes	self	self	1 (strongly disagree)	Does not oppose	1 (strongly disagree)	Does not oppose	1 (strongly disagree)	Does not oppose	1 (strongly disagree)	Does not oppose	1 (strongly disagree)	Does not oppose	Does not oppose	complete	vaccinated	self	91-90	School eligible		Au	Both AU born	4+	One parent
243	20	23		schoolvac		major city	never smoked	Yes			self	self	1 (strongly disagree)	Does not oppose	1 (strongly disagree)	Does not oppose	1 (strongly disagree)	Does not oppose	1 (strongly disagree)	Does not oppose	3	neutral	Does not oppose	complete	vaccinated	self	91-90	School eligible	less dissadvantaged	Au	Both parents OS born	None	both parents
213	22	25		schoolvac	over 2 yrs	major city	never smoked	No	11 to 17	yes	self	self	1 (strongly disagree)	Does not oppose	1 (strongly disagree)	Does not oppose	1 (strongly disagree)	Does not oppose	1 (strongly disagree)	Does not oppose	5	neutral	Does not oppose	complete	vaccinated	self	89-88	School eligible	less dissadvantaged	Au	One parent OS born	4+	Non religious
639	23	25		schoolvac	within last 2 yrs	major city	never smoked	Yes	18 to 24	yes	self	self	1 (strongly disagree)	Does not oppose	1 (strongly disagree)	Does not oppose	1 (strongly disagree)	Does not oppose	1 (strongly disagree)	Does not oppose	1 (strongly disagree)	Does not oppose	Does not oppose	complete	vaccinated	self	89-88	School eligible	less dissadvantaged	Au	One parent OS born	1-3 partners	both parents
1309	24	24	GP		within last 2 yrs	major city	never smoked	Yes	18 to 24	yes	mum	mum	1 (strongly disagree)	Does not oppose	1 (strongly disagree)	Does not oppose	1 (strongly disagree)	Does not oppose	1 (strongly disagree)	Does not oppose	5	neutral	Does not oppose	complete	vaccinated	parents	91-90	School eligible	less dissadvantaged	Au	Both AU born	4+	Non religious
182	19	22		schoolvac		major city	never smoked	Yes			both parents	both parents	1 (strongly disagree)	Does not oppose	1 (strongly disagree)	Does not oppose	1 (strongly disagree)	Does not oppose	1 (strongly disagree)	Does not oppose	4	neutral	Does not oppose	complete	vaccinated	parents	93-92	School eligible	less dissadvantaged	Au	Both AU born	None	both parents
228	18	21	GP			regoinal and remote	never smoked	No	11 to 17	yes	self	self	1 (strongly disagree)	Does not oppose	1 (strongly disagree)	Does not oppose	1 (strongly disagree)	Does not oppose	1 (strongly disagree)	Does not oppose	1 (strongly disagree)	Does not oppose	Does not oppose	complete	vaccinated	self	93-92	School eligible	More dissadvantaged	Au	Both AU born	1-3 partners	Non religious
179	22	25		schoolvac	within last 2 yrs	major city	never smoked	No	11 to 17	yes	mum	mum	1 (strongly disagree)	Does not oppose	1 (strongly disagree)	Does not oppose	1 (strongly disagree)	Does not oppose	1 (strongly disagree)	Does not oppose	1 (strongly disagree)	Does not oppose	Does not oppose	complete	vaccinated	parents	89-88	School eligible	less dissadvantaged	Au	Both AU born	1-3 partners	both parents
1164	18	19	unvaccinate	unvacc		regoinal and remote	ever smoker	Yes	11 to 17		mum	mum	1 (strongly disagree)	Does not oppose	1 (strongly disagree)	Does not oppose	1 (strongly disagree)	Does not oppose	1 (strongly disagree)	Does not oppose	6	oppose	neutral	complete	unvaccinated	parents	96-94	School eligible	less dissadvantaged	Au	Both AU born	1-3 partners	One parent
1342	19	19		schoolvac	within last 2 yrs	major city	never smoked	Yes	11 to 17	yes	mum	mum	4	neutral	1 (strongly disagree)	Does not oppose	5	neutral	5	neutral	2	Does not oppose	Does not oppose	complete	vaccinated	parents	96-94	School eligible	less dissadvantaged	Au	Both AU born	4+	both parents
234	19	22	GP			regoinal and remote	never smoked	Yes	11 to 17	yes	mum	mum	1 (strongly disagree)	Does not oppose	1 (strongly disagree)	Does not oppose	2	Does not oppose	2	Does not oppose	5	neutral	Does not oppose	complete	vaccinated	parents	93-92	School eligible	less dissadvantaged	Au	Both AU born	1-3 partners	One parent
1444	24	24		schoolvac		major city	never smoked	Yes			self	self	1 (strongly disagree)	Does not oppose	1 (strongly disagree)	Does not oppose	2	Does not oppose	2	Does not oppose	2	Does not oppose	Does not oppose	complete	vaccinated	self	91-90	School eligible	less dissadvantaged	Au	Both AU born	None	both parents
1371	19	19		schoolvac		major city	ever smoker	No	11 to 17	yes	mum	mum	1 (strongly disagree)	Does not oppose	1 (strongly disagree)	Does not oppose	1 (strongly disagree)	Does not oppose	1 (strongly disagree)	Does not oppose	1 (strongly disagree)	Does not oppose	Does not oppose	complete	vaccinated	parents	96-94	School eligible	less dissadvantaged	Au	One parent OS born	1-3 partners	Non religious
856	25	26	GP			regoinal and remote	never smoked	No	11 to 17	yes	self	self	1 (strongly disagree)	Does not oppose	1 (strongly disagree)	Does not oppose	1 (strongly disagree)	Does not oppose	2	Does not oppose	3	neutral	neutral	complete	vaccinated	self	89-88	Cath up eligible	More dissadvantaged	Au	Both AU born	4+	both parents
1350	22	22	unvaccinate	unvacc		major city	never smoked	Yes			self	self	3	neutral	2	Does not oppose	2	Does not oppose	2	Does not oppose	2	Does not oppose	Does not oppose	incomplete	unvaccinated	self	93-92	School eligible	More dissadvantaged	other	Both parents OS born	None	Non religious
469	25	28	GP			regoinal and remote	never smoked	Yes	18 to 24	none	self	self	1 (strongly disagree)	Does not oppose	1 (strongly disagree)	Does not oppose	1 (strongly disagree)	Does not oppose	1 (strongly disagree)	Does not oppose	3	neutral	Does not oppose	complete	vaccinated	self	87-86	Cath up eligible	More dissadvantaged	Au	Both AU born	4+	One parent
298	22	25		schoolvac	within last 2 yrs	major city	never smoked	Yes	18 to 24	yes	mum	mum	1 (strongly disagree)	Does not oppose	1 (strongly disagree)	Does not oppose	1 (strongly disagree)	Does not oppose	1 (strongly disagree)	Does not oppose	2	Does not oppose	Does not oppose	complete	vaccinated	parents	89-88	School eligible	More dissadvantaged	Au	Both AU born	1-3 partners	One parent
50	23	26	GP		within last 2 yrs	major city	never smoked	Yes	18 to 24	yes	self	self	2	Does not oppose	3	neutral	1 (strongly disagree)	Does not oppose	1 (strongly disagree)	Does not oppose	1 (strongly disagree)	Does not oppose	Does not oppose	complete	vaccinated	self	89-88	Cath up eligible	less dissadvantaged	Au	Both parents OS born	1-3 partners	both parents
1144	24	25	unvaccinate	unvacc	within last 2 yrs	regoinal and remote	ever smoker	No	11 to 17	none	self	self	1 (strongly disagree)	Does not oppose	1 (strongly disagree)	Does not oppose	2	Does not oppose	3	neutral	1 (strongly disagree)	Does not oppose	Does not oppose	incomplete	unvaccinated	self	89-88	School eligible	More dissadvantaged	Au	Both AU born	4+
4	21	25		schoolvac	within last 2 yrs	major city	never smoked	Yes	18 to 24	yes	mum	mum	1 (strongly disagree)	Does not oppose	1 (strongly disagree)	Does not oppose	1 (strongly disagree)	Does not oppose	1 (strongly disagree)	Does not oppose	3	neutral	Does not oppose	complete	vaccinated	parents	89-88	School eligible	less dissadvantaged	Au	One parent OS born	4+	both parents
288	25	28	GP		over 2 yrs		ever smoker	Yes	11 to 17	yes	self	self	1 (strongly disagree)	Does not oppose	1 (strongly disagree)	Does not oppose	1 (strongly disagree)	Does not oppose	1 (strongly disagree)	Does not oppose	1 (strongly disagree)	Does not oppose	Does not oppose	complete	vaccinated	self	87-86	Cath up eligible		Au	Both AU born	4+	both parents
784	22	24		schoolvac	within last 2 yrs	major city	ever smoker	No	11 to 17	yes	self	self	2	Does not oppose			2	Does not oppose	1 (strongly disagree)	Does not oppose	1 (strongly disagree)	Does not oppose	Does not oppose	complete	vaccinated	self	91-90	School eligible	less dissadvantaged	Au	Both AU born	4+	Non religious
450	21	24		schoolvac	within last 2 yrs	major city	never smoked	Yes	18 to 24	yes	both parents	both parents	1 (strongly disagree)	Does not oppose	1 (strongly disagree)	Does not oppose	1 (strongly disagree)	Does not oppose	1 (strongly disagree)	Does not oppose	1 (strongly disagree)	Does not oppose	Does not oppose	complete	vaccinated	parents	91-90	School eligible	less dissadvantaged	Au	Both AU born	1-3 partners	Non religious
772	22	24	GP		within last 2 yrs	major city	ever smoker	No	11 to 17	yes	self	self	6	oppose	5	neutral	4	neutral	4	neutral	1 (strongly disagree)	Does not oppose	Does not oppose	incomplete	vaccinated	self	91-90	School eligible	less dissadvantaged	Au	Both AU born	4+	One parent
72	21	24		schoolvac	within last 2 yrs	regoinal and remote	never smoked	Yes	11 to 17	yes	self	self	1 (strongly disagree)	Does not oppose	1 (strongly disagree)	Does not oppose	1 (strongly disagree)	Does not oppose	1 (strongly disagree)	Does not oppose	1 (strongly disagree)	Does not oppose	neutral	complete	vaccinated	self	91-90	School eligible	More dissadvantaged	Au	One parent OS born	4+	both parents
908	22	24		schoolvac	within last 2 yrs	major city	never smoked	No	11 to 17	yes	self	self	1 (strongly disagree)	Does not oppose	1 (strongly disagree)	Does not oppose	1 (strongly disagree)	Does not oppose	1 (strongly disagree)	Does not oppose	1 (strongly disagree)	Does not oppose	Does not oppose	complete	vaccinated	self	91-90	School eligible	less dissadvantaged	Au	Both AU born	1-3 partners	both parents
721	24	26	GP			major city	ever smoker	Yes	18 to 24	yes	both parents	both parents	1 (strongly disagree)	Does not oppose	1 (strongly disagree)	Does not oppose	1 (strongly disagree)	Does not oppose	1 (strongly disagree)	Does not oppose	1 (strongly disagree)	Does not oppose	Does not oppose	complete	vaccinated	parents	89-88	Cath up eligible	More dissadvantaged	Au	Both AU born	1-3 partners	both parents
751	21	23	GP				never smoked	Yes	18 to 24	yes	mum	mum	1 (strongly disagree)	Does not oppose	1 (strongly disagree)	Does not oppose	1 (strongly disagree)	Does not oppose	1 (strongly disagree)	Does not oppose	1 (strongly disagree)	Does not oppose	Does not oppose	complete	vaccinated	parents	91-90	School eligible		other	Both parents OS born	1-3 partners	both parents
494	21	24		schoolvac	within last 2 yrs	regoinal and remote	never smoked	Yes	11 to 17	yes	both parents	both parents	1 (strongly disagree)	Does not oppose	1 (strongly disagree)	Does not oppose	1 (strongly disagree)	Does not oppose	1 (strongly disagree)	Does not oppose	2	Does not oppose	Does not oppose	complete	vaccinated	parents	91-90	School eligible	less dissadvantaged	Au	Both AU born	4+	One parent
823	25	27	GP		over 2 yrs	regoinal and remote	never smoked	No	18 to 24	yes	self	self	1 (strongly disagree)	Does not oppose	1 (strongly disagree)	Does not oppose	1 (strongly disagree)	Does not oppose	1 (strongly disagree)	Does not oppose	2	Does not oppose	Does not oppose	complete	vaccinated	self	87-86	Cath up eligible	More dissadvantaged	Au	Both AU born	1-3 partners	both parents
332	22	24		schoolvac	within last 2 yrs	major city	never smoked	Yes	11 to 17	yes	self	self	1 (strongly disagree)	Does not oppose	1 (strongly disagree)	Does not oppose	1 (strongly disagree)	Does not oppose	1 (strongly disagree)	Does not oppose	1 (strongly disagree)	Does not oppose	Does not oppose	complete	vaccinated	self	91-90	School eligible	less dissadvantaged	Au	One parent OS born	1-3 partners	both parents
1288	22	23	unvaccinate	unvacc	within last 2 yrs	major city	never smoked	Yes	18 to 24	yes	mum	mum	2	Does not oppose	1 (strongly disagree)	Does not oppose	2	Does not oppose	2	Does not oppose	2	Does not oppose	Does not oppose	incomplete	unvaccinated	parents	91-90	School eligible	less dissadvantaged	Au	Both AU born	1-3 partners	Non religious
406	24	27	GP		over 2 yrs	regoinal and remote	ever smoker	Yes	11 to 17	yes	self	self	1 (strongly disagree)	Does not oppose	1 (strongly disagree)	Does not oppose	1 (strongly disagree)	Does not oppose	1 (strongly disagree)	Does not oppose	1 (strongly disagree)	Does not oppose	Does not oppose	complete	vaccinated	self	87-86	Cath up eligible	More dissadvantaged	Au	Both AU born	4+	Non religious
118	18	22		schoolvac		major city	never smoked	No			self	self	1 (strongly disagree)	Does not oppose	1 (strongly disagree)	Does not oppose	1 (strongly disagree)	Does not oppose	1 (strongly disagree)	Does not oppose	1 (strongly disagree)	Does not oppose	Does not oppose	complete	vaccinated	self	93-92	School eligible	More dissadvantaged	Au	Both parents OS born	None	both parents
691	19	22		schoolvac		regoinal and remote	never smoked	Yes			mum	mum	1 (strongly disagree)	Does not oppose	1 (strongly disagree)	Does not oppose	1 (strongly disagree)	Does not oppose	1 (strongly disagree)	Does not oppose	2	Does not oppose	Does not oppose	complete	vaccinated	parents	93-92	School eligible	More dissadvantaged	Au	Both AU born	None	both parents
785	21	23		schoolvac	over 2 yrs	regoinal and remote	ever smoker	No	11 to 17	yes	self	self	1 (strongly disagree)	Does not oppose	1 (strongly disagree)	Does not oppose	1 (strongly disagree)	Does not oppose	1 (strongly disagree)	Does not oppose	5	neutral	Does not oppose	complete	vaccinated	self	91-90	School eligible	More dissadvantaged	Au	Both AU born	4+	Non religious
695	21	23		schoolvac	within last 2 yrs	major city	never smoked	Yes	18 to 24	yes	mum	mum	1 (strongly disagree)	Does not oppose	1 (strongly disagree)	Does not oppose	1 (strongly disagree)	Does not oppose	1 (strongly disagree)	Does not oppose	1 (strongly disagree)	Does not oppose	Does not oppose	complete	vaccinated	parents	91-90	School eligible	less dissadvantaged	Au	Both AU born	1-3 partners	One parent
565	22	25		schoolvac	over 2 yrs	major city	never smoked	Yes	11 to 17	yes	mum	mum	2	Does not oppose	2	Does not oppose	1 (strongly disagree)	Does not oppose	1 (strongly disagree)	Does not oppose	2	Does not oppose	Does not oppose	complete	vaccinated	parents	89-88	School eligible	less dissadvantaged	Au	Both AU born	4+	both parents
1165	20	21	unvaccinate	unvacc				Yes	18 to 24	yes	self	self	1 (strongly disagree)	Does not oppose	1 (strongly disagree)	Does not oppose	1 (strongly disagree)	Does not oppose	1 (strongly disagree)	Does not oppose	1 (strongly disagree)	Does not oppose	Does not oppose	complete	unvaccinated	self	93-92	School eligible		other	Both parents OS born	1-3 partners	One parent
1086	23	24		schoolvac		major city	ever smoker	No	18 to 24	yes	both parents	both parents	1 (strongly disagree)	Does not oppose	1 (strongly disagree)	Does not oppose	1 (strongly disagree)	Does not oppose	1 (strongly disagree)	Does not oppose	1 (strongly disagree)	Does not oppose	Does not oppose	complete	vaccinated	parents	91-90	School eligible	less dissadvantaged	Au	Both AU born	4+	Non religious
527	20	22		schoolvac	within last 2 yrs	major city	never smoked	No	11 to 17	yes	mum	mum	1 (strongly disagree)	Does not oppose	1 (strongly disagree)	Does not oppose	1 (strongly disagree)	Does not oppose	1 (strongly disagree)	Does not oppose	1 (strongly disagree)	Does not oppose	Does not oppose	complete	vaccinated	parents	93-92	School eligible	less dissadvantaged	Au	Both parents OS born	1-3 partners	Non religious
1234	25	26	GP			major city	never smoked	No			self	self	1 (strongly disagree)	Does not oppose	1 (strongly disagree)	Does not oppose	1 (strongly disagree)	Does not oppose	1 (strongly disagree)	Does not oppose	1 (strongly disagree)	Does not oppose	Does not oppose	incomplete	vaccinated	self	89-88	Cath up eligible	More dissadvantaged	Au	Both AU born	None
245	21	24		schoolvac		major city	never smoked	No			self	self	1 (strongly disagree)	Does not oppose	1 (strongly disagree)	Does not oppose	1 (strongly disagree)	Does not oppose	1 (strongly disagree)	Does not oppose	3	neutral	Does not oppose	complete	vaccinated	self	91-90	School eligible	less dissadvantaged	Au	Both AU born	None	Non religious
197	25	28	GP		within last 2 yrs	major city	never smoked	Yes	18 to 24	yes	self	self	1 (strongly disagree)	Does not oppose	1 (strongly disagree)	Does not oppose	1 (strongly disagree)	Does not oppose	1 (strongly disagree)	Does not oppose	2	Does not oppose	neutral	complete	vaccinated	self	87-86	Cath up eligible	less dissadvantaged	Au	Both AU born	4+	One parent
1333	18	18	GP			major city	never smoked	No			both parents	both parents	1 (strongly disagree)	Does not oppose	1 (strongly disagree)	Does not oppose	1 (strongly disagree)	Does not oppose	1 (strongly disagree)	Does not oppose	2	Does not oppose	Does not oppose	complete	vaccinated	parents	96-94	School eligible	less dissadvantaged	Au	Both parents OS born	None	One parent
860	21	22		schoolvac		major city	never smoked	Yes			self	self	1 (strongly disagree)	Does not oppose	1 (strongly disagree)	Does not oppose	1 (strongly disagree)	Does not oppose	1 (strongly disagree)	Does not oppose	1 (strongly disagree)	Does not oppose	Does not oppose	complete	vaccinated	self	93-92	School eligible	More dissadvantaged	other	One parent OS born	None	One parent
267	23	25	GP				never smoked	Yes	11 to 17	yes	self	self	1 (strongly disagree)	Does not oppose	1 (strongly disagree)	Does not oppose	1 (strongly disagree)	Does not oppose	1 (strongly disagree)	Does not oppose	1 (strongly disagree)	Does not oppose	Does not oppose	complete	vaccinated	self	89-88	Cath up eligible		Au	Both AU born	1-3 partners	One parent
654	25	27	GP		within last 2 yrs	major city	never smoked	Yes	11 to 17	yes	self	self	6	oppose	1 (strongly disagree)	Does not oppose	2	Does not oppose	2	Does not oppose	4	neutral	Does not oppose	complete	vaccinated	self	87-86	Cath up eligible	less dissadvantaged	Au	One parent OS born	1-3 partners	Non religious
973	20	21	unvaccinate	unvacc		major city	never smoked	Yes			mum	mum	4	neutral	3	neutral	5	neutral	7 (strongly agree)	oppose	3	neutral	oppose	incomplete	unvaccinated	parents	93-92	School eligible	More dissadvantaged	Au	Both AU born	None	both parents
489	21	24		schoolvac	within last 2 yrs	regoinal and remote	never smoked	Yes	11 to 17	yes	mum	mum	1 (strongly disagree)	Does not oppose	1 (strongly disagree)	Does not oppose	1 (strongly disagree)	Does not oppose	1 (strongly disagree)	Does not oppose	1 (strongly disagree)	Does not oppose	Does not oppose	complete	vaccinated	parents	91-90	School eligible	less dissadvantaged	Au	Both AU born	1-3 partners	One parent
518	18	20		schoolvac		regoinal and remote	never smoked	Yes	11 to 17	yes	mum	mum	1 (strongly disagree)	Does not oppose	1 (strongly disagree)	Does not oppose	4	neutral	4	neutral	7 (strongly agree)	oppose	Does not oppose	complete	vaccinated	parents	96-94	School eligible	More dissadvantaged	Au	Both AU born	4+	both parents
1441	18	18		schoolvac		major city	ever smoker	Yes			both parents	both parents	1 (strongly disagree)	Does not oppose	1 (strongly disagree)	Does not oppose	1 (strongly disagree)	Does not oppose	1 (strongly disagree)	Does not oppose	1 (strongly disagree)	Does not oppose	Does not oppose	complete	vaccinated	parents	96-94	School eligible	less dissadvantaged	Au	One parent OS born	None	Non religious
775	19	20	unvaccinate	unvacc		major city	never smoked	No			self	self	3	neutral	3	neutral	2	Does not oppose	2	Does not oppose	3	neutral	neutral	complete	unvaccinated	self	96-94	School eligible	less dissadvantaged	Au	Both AU born	None	both parents
513	20	22		schoolvac	within last 2 yrs	major city	never smoked	Yes	18 to 24	yes	both parents	both parents	1 (strongly disagree)	Does not oppose	1 (strongly disagree)	Does not oppose	1 (strongly disagree)	Does not oppose	1 (strongly disagree)	Does not oppose	1 (strongly disagree)	Does not oppose	Does not oppose	complete	vaccinated	parents	93-92	School eligible	less dissadvantaged	Au	Both AU born	1-3 partners	One parent
125	20	23		schoolvac		major city	never smoked	Yes	11 to 17	yes	self	self	1 (strongly disagree)	Does not oppose	1 (strongly disagree)	Does not oppose	1 (strongly disagree)	Does not oppose	1 (strongly disagree)	Does not oppose	1 (strongly disagree)	Does not oppose	Does not oppose	complete	vaccinated	self	91-90	School eligible	less dissadvantaged	Au	One parent OS born	1-3 partners	both parents
890	22	23		schoolvac	within last 2 yrs	major city	never smoked	Yes	11 to 17	yes	self	self	1 (strongly disagree)	Does not oppose	1 (strongly disagree)	Does not oppose	1 (strongly disagree)	Does not oppose	1 (strongly disagree)	Does not oppose	1 (strongly disagree)	Does not oppose	neutral	complete	vaccinated	self	91-90	School eligible	less dissadvantaged	Au	Both AU born	4+	both parents
135	23	26	GP		within last 2 yrs	regoinal and remote	never smoked	Yes	11 to 17	yes	self	self	1 (strongly disagree)	Does not oppose	1 (strongly disagree)	Does not oppose	1 (strongly disagree)	Does not oppose	1 (strongly disagree)	Does not oppose	1 (strongly disagree)	Does not oppose	Does not oppose	complete	vaccinated	self	89-88	Cath up eligible	More dissadvantaged	Au	Both AU born	4+	both parents
1007	24	25		schoolvac		regoinal and remote	never smoked	Yes	18 to 24	yes	self	self	1 (strongly disagree)	Does not oppose	1 (strongly disagree)	Does not oppose	1 (strongly disagree)	Does not oppose	1 (strongly disagree)	Does not oppose	1 (strongly disagree)	Does not oppose	Does not oppose	complete	vaccinated	self	89-88	School eligible	More dissadvantaged	Au	Both AU born	1-3 partners	Non religious
750	25	27	GP			major city	never smoked	Yes	18 to 24	yes	self	self	1 (strongly disagree)	Does not oppose	1 (strongly disagree)	Does not oppose	1 (strongly disagree)	Does not oppose	1 (strongly disagree)	Does not oppose	1 (strongly disagree)	Does not oppose	Does not oppose	complete	vaccinated	self	87-86	Cath up eligible	less dissadvantaged	Au	One parent OS born	4+	One parent
870	23	25		schoolvac	within last 2 yrs	major city	ever smoker	No	11 to 17	yes	both parents	both parents	1 (strongly disagree)	Does not oppose	1 (strongly disagree)	Does not oppose	1 (strongly disagree)	Does not oppose	1 (strongly disagree)	Does not oppose	1 (strongly disagree)	Does not oppose	Does not oppose	complete	vaccinated	parents	89-88	School eligible	less dissadvantaged	Au	Both AU born	4+	One parent
28	25	28	GP		within last 2 yrs	major city	never smoked	Yes	18 to 24	yes	self	self	1 (strongly disagree)	Does not oppose	1 (strongly disagree)	Does not oppose	1 (strongly disagree)	Does not oppose	1 (strongly disagree)	Does not oppose	2	Does not oppose	Does not oppose	incomplete	vaccinated	self	87-86	Cath up eligible	less dissadvantaged	Au	Both AU born	4+	both parents
662	22	24		schoolvac		major city	never smoked	Yes			both parents	both parents	1 (strongly disagree)	Does not oppose	1 (strongly disagree)	Does not oppose	1 (strongly disagree)	Does not oppose	1 (strongly disagree)	Does not oppose	1 (strongly disagree)	Does not oppose	Does not oppose	complete	vaccinated	parents	91-90	School eligible	less dissadvantaged	Au	Both AU born	None	both parents
905	21	21		schoolvac	within last 2 yrs	regoinal and remote	never smoked	Yes	11 to 17	yes	self	self	1 (strongly disagree)	Does not oppose	1 (strongly disagree)	Does not oppose	1 (strongly disagree)	Does not oppose	1 (strongly disagree)	Does not oppose	1 (strongly disagree)	Does not oppose	Does not oppose	complete	vaccinated	self	93-92	School eligible	More dissadvantaged	Au	One parent OS born	4+	both parents
1168	19	19	unvaccinate	unvacc		major city	never smoked	Yes	18 to 24	yes	self	self	2	Does not oppose	2	Does not oppose	2	Does not oppose	2	Does not oppose	2	Does not oppose	Does not oppose	complete	unvaccinated	self	96-94	School eligible	less dissadvantaged	Au	Both AU born	1-3 partners	both parents
1345	25	25	GP		over 2 yrs	major city	never smoked	Yes	11 to 17	none	self	self	2	Does not oppose	1 (strongly disagree)	Does not oppose	2	Does not oppose	2	Does not oppose	5	neutral	Does not oppose	complete	vaccinated	self	89-88	School eligible	less dissadvantaged	Au	Both parents OS born	4+	both parents
1161	20	21		schoolvac		major city	never smoked	Yes			both parents	both parents	1 (strongly disagree)	Does not oppose	1 (strongly disagree)	Does not oppose	1 (strongly disagree)	Does not oppose	1 (strongly disagree)	Does not oppose	2	Does not oppose	neutral	complete	vaccinated	parents	93-92	School eligible	More dissadvantaged	Au	Both parents OS born	None	both parents
1424	22	23		schoolvac		major city	never smoked	Yes			self	self	1 (strongly disagree)	Does not oppose	1 (strongly disagree)	Does not oppose	1 (strongly disagree)	Does not oppose	1 (strongly disagree)	Does not oppose	1 (strongly disagree)	Does not oppose	Does not oppose	complete	vaccinated	self	91-90	School eligible	More dissadvantaged	Au	Both parents OS born	None	both parents
496	21	24	unvaccinate	unvacc	over 2 yrs	major city	ever smoker	No	11 to 17	yes	self	self	1 (strongly disagree)	Does not oppose	1 (strongly disagree)	Does not oppose	1 (strongly disagree)	Does not oppose	1 (strongly disagree)	Does not oppose	5	neutral	neutral	complete	unvaccinated	self	91-90	School eligible	less dissadvantaged	Au	Both parents OS born	4+	both parents
1421	19	19		schoolvac		major city	ever smoker	Yes	11 to 17	yes	mum	mum	1 (strongly disagree)	Does not oppose	1 (strongly disagree)	Does not oppose	1 (strongly disagree)	Does not oppose	1 (strongly disagree)	Does not oppose	2	Does not oppose	Does not oppose	complete	vaccinated	parents	96-94	School eligible	less dissadvantaged	Au	Both AU born		both parents
943	24	25	GP		over 2 yrs	major city	never smoked	Yes	18 to 24	none	mum	mum	1 (strongly disagree)	Does not oppose	1 (strongly disagree)	Does not oppose	1 (strongly disagree)	Does not oppose	1 (strongly disagree)	Does not oppose	1 (strongly disagree)	Does not oppose	neutral	complete	vaccinated	parents	89-88	School eligible	less dissadvantaged	Au	Both AU born	4+	both parents
350	22	25	unvaccinate	unvacc		major city	never smoked	Yes			self	self	1 (strongly disagree)	Does not oppose	1 (strongly disagree)	Does not oppose	1 (strongly disagree)	Does not oppose	1 (strongly disagree)	Does not oppose	4	neutral	Does not oppose	complete	unvaccinated	self	89-88	School eligible	less dissadvantaged	other	Both parents OS born	None	both parents
1070	24	26	GP		within last 2 yrs		never smoked	No	11 to 17	yes	mum	mum	1 (strongly disagree)	Does not oppose	1 (strongly disagree)	Does not oppose	1 (strongly disagree)	Does not oppose	1 (strongly disagree)	Does not oppose	1 (strongly disagree)	Does not oppose	Does not oppose	complete	vaccinated	parents	89-88	Cath up eligible		Au	Both AU born	1-3 partners	both parents
969	25	26	GP		within last 2 yrs	major city	never smoked	No	11 to 17	yes	self	self	2	Does not oppose	2	Does not oppose	2	Does not oppose	2	Does not oppose	3	neutral	Does not oppose	complete	vaccinated	self	89-88	Cath up eligible	less dissadvantaged	Au	Both AU born	4+	Non religious
1341	21	22		schoolvac	within last 2 yrs	major city	never smoked	Yes	11 to 17	yes	both parents	both parents	1 (strongly disagree)	Does not oppose	1 (strongly disagree)	Does not oppose	1 (strongly disagree)	Does not oppose	1 (strongly disagree)	Does not oppose	1 (strongly disagree)	Does not oppose	Does not oppose	complete	vaccinated	parents	93-92	School eligible	less dissadvantaged	Au	Both AU born	4+	Non religious
311	23	25	GP		within last 2 yrs	major city	never smoked	Yes	18 to 24	none	mum	mum	1 (strongly disagree)	Does not oppose	1 (strongly disagree)	Does not oppose	1 (strongly disagree)	Does not oppose	1 (strongly disagree)	Does not oppose	1 (strongly disagree)	Does not oppose	Does not oppose	complete	vaccinated	parents	89-88	Cath up eligible	less dissadvantaged	Au	Both AU born	1-3 partners	One parent
1318	19	20		schoolvac		regoinal and remote	never smoked	No			mum	mum	1 (strongly disagree)	Does not oppose	1 (strongly disagree)	Does not oppose	1 (strongly disagree)	Does not oppose	1 (strongly disagree)	Does not oppose	3	neutral	neutral	complete	vaccinated	parents	96-94	School eligible	More dissadvantaged	Au	Both AU born	None	Non religious
1049	20	22		schoolvac	within last 2 yrs	major city	never smoked	No	11 to 17	yes	self	self	1 (strongly disagree)	Does not oppose	1 (strongly disagree)	Does not oppose	1 (strongly disagree)	Does not oppose	1 (strongly disagree)	Does not oppose	3	neutral	Does not oppose	complete	vaccinated	self	93-92	School eligible	less dissadvantaged	Au	Both parents OS born	4+	both parents
215	21	24		schoolvac		major city	never smoked	Yes	11 to 17	yes	self	self	1 (strongly disagree)	Does not oppose	1 (strongly disagree)	Does not oppose	1 (strongly disagree)	Does not oppose	2	Does not oppose	2	Does not oppose	Does not oppose	complete	vaccinated	self	91-90	School eligible	less dissadvantaged	Au	One parent OS born	1-3 partners	Non religious
91	19	22	GP		within last 2 yrs	major city	never smoked	Yes	11 to 17	yes	both parents	both parents	1 (strongly disagree)	Does not oppose	1 (strongly disagree)	Does not oppose	1 (strongly disagree)	Does not oppose	1 (strongly disagree)	Does not oppose	1 (strongly disagree)	Does not oppose	Does not oppose	complete	vaccinated	parents	93-92	School eligible	less dissadvantaged	Au	One parent OS born	4+	Non religious
318	21	24		schoolvac		regoinal and remote	never smoked	Yes			mum	mum	1 (strongly disagree)	Does not oppose	1 (strongly disagree)	Does not oppose	1 (strongly disagree)	Does not oppose	1 (strongly disagree)	Does not oppose	1 (strongly disagree)	Does not oppose	Does not oppose	complete	vaccinated	parents	91-90	School eligible	More dissadvantaged	Au	Both AU born	None	both parents
43	19	22		schoolvac		major city	ever smoker	Yes	11 to 17	yes	mum	mum	1 (strongly disagree)	Does not oppose	1 (strongly disagree)	Does not oppose	1 (strongly disagree)	Does not oppose	1 (strongly disagree)	Does not oppose	1 (strongly disagree)	Does not oppose	Does not oppose	complete	vaccinated	parents	93-92	School eligible	less dissadvantaged	Au	Both AU born	4+	both parents
635	18	20	GP			major city	never smoked	Yes	11 to 17	yes	self	self	1 (strongly disagree)	Does not oppose	1 (strongly disagree)	Does not oppose	1 (strongly disagree)	Does not oppose	1 (strongly disagree)	Does not oppose	3	neutral	neutral	complete	vaccinated	self	96-94	School eligible	less dissadvantaged	Au	Both AU born	1-3 partners	One parent
177	20	23		schoolvac	within last 2 yrs	major city	never smoked	Yes	11 to 17	yes	both parents	both parents	1 (strongly disagree)	Does not oppose	1 (strongly disagree)	Does not oppose	1 (strongly disagree)	Does not oppose	1 (strongly disagree)	Does not oppose	2	Does not oppose	Does not oppose	complete	vaccinated	parents	91-90	School eligible	less dissadvantaged	Au	Both AU born	1-3 partners	Non religious
1422	20	21	unvaccinate	unvacc	within last 2 yrs	major city	never smoked	No	18 to 24	yes	both parents	both parents	1 (strongly disagree)	Does not oppose	1 (strongly disagree)	Does not oppose	3	neutral	3	neutral	5	neutral	Does not oppose	complete	unvaccinated	parents	93-92	School eligible	less dissadvantaged	Au	One parent OS born	1-3 partners	Non religious
20	21	24		schoolvac		major city	never smoked	Yes			self	self	1 (strongly disagree)	Does not oppose	1 (strongly disagree)	Does not oppose	1 (strongly disagree)	Does not oppose	1 (strongly disagree)	Does not oppose	2	Does not oppose	Does not oppose	complete	vaccinated	self	91-90	School eligible	less dissadvantaged	Au	One parent OS born	None	both parents
1263	22	22		schoolvac			never smoked	No	18 to 24	yes	mum	mum	1 (strongly disagree)	Does not oppose	1 (strongly disagree)	Does not oppose	1 (strongly disagree)	Does not oppose	1 (strongly disagree)	Does not oppose	4	neutral	neutral	complete	vaccinated	parents	93-92	School eligible			Both AU born	1-3 partners	One parent
1307	24	25		schoolvac	within last 2 yrs	major city	ever smoker	Yes	18 to 24		both parents	both parents	1 (strongly disagree)	Does not oppose	1 (strongly disagree)	Does not oppose	1 (strongly disagree)	Does not oppose	1 (strongly disagree)	Does not oppose	1 (strongly disagree)	Does not oppose	Does not oppose	complete	vaccinated	parents	89-88	School eligible	More dissadvantaged	Au	Both AU born	4+	both parents
17	24	27	GP		within last 2 yrs	major city	ever smoker	Yes	11 to 17	yes	self	self	4	neutral	1 (strongly disagree)	Does not oppose	1 (strongly disagree)	Does not oppose	1 (strongly disagree)	Does not oppose	5	neutral	Does not oppose	complete	vaccinated	self	87-86	Cath up eligible	less dissadvantaged	Au	Both AU born	4+	One parent
294	19	22		schoolvac	within last 2 yrs	major city	never smoked	Yes	11 to 17	yes	both parents	both parents	1 (strongly disagree)	Does not oppose	1 (strongly disagree)	Does not oppose	1 (strongly disagree)	Does not oppose	1 (strongly disagree)	Does not oppose	1 (strongly disagree)	Does not oppose	Does not oppose	complete	vaccinated	parents	93-92	School eligible	less dissadvantaged	Au	Both AU born	1-3 partners	both parents
114	23	26	GP			regoinal and remote	never smoked	No			self	self	1 (strongly disagree)	Does not oppose	1 (strongly disagree)	Does not oppose	1 (strongly disagree)	Does not oppose	1 (strongly disagree)	Does not oppose	5	neutral	oppose	complete	vaccinated	self	89-88	Cath up eligible	More dissadvantaged	Au	Both AU born	None	both parents
70	23	26	unvaccinate	unvacc	within last 2 yrs	regoinal and remote	ever smoker	No	11 to 17	none	self	self	2	Does not oppose	2	Does not oppose	2	Does not oppose	2	Does not oppose	3	neutral	Does not oppose	complete	unvaccinated	self	89-88	Cath up eligible	less dissadvantaged	Au	Both AU born	4+	Non religious
1047	20	21	GP			regoinal and remote	never smoked	Yes			mum	mum	1 (strongly disagree)	Does not oppose	1 (strongly disagree)	Does not oppose	1 (strongly disagree)	Does not oppose	1 (strongly disagree)	Does not oppose	1 (strongly disagree)	Does not oppose	Does not oppose	complete	vaccinated	parents	93-92	School eligible	less dissadvantaged	Au	Both AU born	None	both parents
650	22	24	unvaccinate	unvacc			never smoked	No			self	self	1 (strongly disagree)	Does not oppose	1 (strongly disagree)	Does not oppose	1 (strongly disagree)	Does not oppose	1 (strongly disagree)	Does not oppose	1 (strongly disagree)	Does not oppose	neutral	complete	unvaccinated	self	91-90	School eligible		other	Both parents OS born	None	Non religious
1071	24	25	unvaccinate	unvacc	within last 2 yrs		never smoked	Yes	11 to 17	none	self	self	1 (strongly disagree)	Does not oppose	1 (strongly disagree)	Does not oppose	1 (strongly disagree)	Does not oppose	1 (strongly disagree)	Does not oppose	1 (strongly disagree)	Does not oppose	Does not oppose	complete	unvaccinated	self	89-88	School eligible		other	One parent OS born	1-3 partners	One parent
668	24	27	unvaccinate	unvacc	within last 2 yrs		never smoked	No	18 to 24	yes	self	self	1 (strongly disagree)	Does not oppose	1 (strongly disagree)	Does not oppose	1 (strongly disagree)	Does not oppose	1 (strongly disagree)	Does not oppose	1 (strongly disagree)	Does not oppose	neutral	complete	unvaccinated	self	87-86	Cath up eligible		other		1-3 partners	Non religious
1343	24	25	unvaccinate	unvacc	within last 2 yrs		never smoked	No	11 to 17	yes	self	self	1 (strongly disagree)	Does not oppose	1 (strongly disagree)	Does not oppose	1 (strongly disagree)	Does not oppose	1 (strongly disagree)	Does not oppose	1 (strongly disagree)	Does not oppose	Does not oppose	complete	unvaccinated	self	89-88	School eligible		other		4+	One parent
724	22	24	unvaccinate	unvacc	within last 2 yrs	major city	never smoked	No	11 to 17	yes	self	self	1 (strongly disagree)	Does not oppose	1 (strongly disagree)	Does not oppose	1 (strongly disagree)	Does not oppose	4	neutral	2	Does not oppose	Does not oppose	incomplete	unvaccinated	self	91-90	School eligible	less dissadvantaged	Au	Both AU born		Non religious
1170	20	21	unvaccinate	unvacc		major city	never smoked	No	11 to 17	yes	mum	mum	1 (strongly disagree)	Does not oppose	1 (strongly disagree)	Does not oppose	4	neutral	5	neutral	4	neutral	Does not oppose	complete	unvaccinated	parents	93-92	School eligible	less dissadvantaged	Au	One parent OS born	1-3 partners	One parent
376	20	23	unvaccinate	unvacc	within last 2 yrs		never smoked	Yes	11 to 17	yes	self	self	1 (strongly disagree)	Does not oppose	1 (strongly disagree)	Does not oppose	1 (strongly disagree)	Does not oppose	1 (strongly disagree)	Does not oppose	1 (strongly disagree)	Does not oppose	Does not oppose	complete	unvaccinated	self	91-90	School eligible		Au	One parent OS born	1-3 partners	One parent
1417	25	25	unvaccinate	unvacc	within last 2 yrs		ever smoker	No	11 to 17	yes	self	self	2	Does not oppose	2	Does not oppose	3	neutral	3	neutral	3	neutral	Does not oppose	complete	unvaccinated	self	89-88	School eligible		Au	Both AU born	4+	Non religious
1052	22	24	GP		within last 2 yrs	major city	never smoked	Yes	11 to 17	yes	self	self	1 (strongly disagree)	Does not oppose	1 (strongly disagree)	Does not oppose	1 (strongly disagree)	Does not oppose	1 (strongly disagree)	Does not oppose	5	neutral	Does not oppose	complete	vaccinated	self	91-90	School eligible	less dissadvantaged	Au	Both AU born	4+	both parents
203	21	24	unvaccinate	unvacc			never smoked	No	18 to 24	yes	self	self	1 (strongly disagree)	Does not oppose	1 (strongly disagree)	Does not oppose	1 (strongly disagree)	Does not oppose	1 (strongly disagree)	Does not oppose	5	neutral	Does not oppose	complete	unvaccinated	self	91-90	School eligible		other	Both parents OS born	1-3 partners	One parent
186	23	26	unvaccinate	unvacc	within last 2 yrs	major city	never smoked	Yes	11 to 17	yes	self	self	1 (strongly disagree)	Does not oppose	1 (strongly disagree)	Does not oppose	1 (strongly disagree)	Does not oppose	1 (strongly disagree)	Does not oppose	1 (strongly disagree)	Does not oppose	Does not oppose	complete	unvaccinated	self	89-88	Cath up eligible	More dissadvantaged	Au	Both AU born	4+	both parents
910	19	20	GP		within last 2 yrs	major city	never smoked	Yes	11 to 17	yes	self	self	1 (strongly disagree)	Does not oppose	1 (strongly disagree)	Does not oppose	1 (strongly disagree)	Does not oppose	1 (strongly disagree)	Does not oppose	1 (strongly disagree)	Does not oppose	Does not oppose	complete	vaccinated	self	96-94	School eligible	less dissadvantaged	Au	Both AU born	4+	Non religious
214	24	27	unvaccinate	unvacc			never smoked	No			self	self	1 (strongly disagree)	Does not oppose	1 (strongly disagree)	Does not oppose	1 (strongly disagree)	Does not oppose	1 (strongly disagree)	Does not oppose	1 (strongly disagree)	Does not oppose	Does not oppose	complete	unvaccinated	self	87-86	Cath up eligible		other	Both parents OS born	None
1166	24	25	unvaccinate	unvacc	within last 2 yrs	major city	ever smoker	No	11 to 17	yes	self	self	4	neutral	4	neutral	4	neutral	4	neutral	1 (strongly disagree)	Does not oppose	Does not oppose	incomplete	unvaccinated	self	89-88	School eligible	More dissadvantaged	Au	Both parents OS born	4+	Non religious
666	19	21	unvaccinate	unvacc		major city	never smoked	Yes			self	self	1 (strongly disagree)	Does not oppose	1 (strongly disagree)	Does not oppose	1 (strongly disagree)	Does not oppose	1 (strongly disagree)	Does not oppose	1 (strongly disagree)	Does not oppose	Does not oppose	complete	unvaccinated	self	93-92	School eligible	less dissadvantaged	Au	Both AU born	None	both parents
385	21	23	unvaccinate	unvacc			ever smoker	No	18 to 24	yes	self	self	1 (strongly disagree)	Does not oppose	1 (strongly disagree)	Does not oppose	1 (strongly disagree)	Does not oppose	1 (strongly disagree)	Does not oppose	3	neutral	neutral	complete	unvaccinated	self	91-90	School eligible		other	Both parents OS born	4+	Non religious
1123	22	23	unvaccinate	unvacc	within last 2 yrs	major city	never smoked	Yes	18 to 24	yes	mum	mum	2	Does not oppose	2	Does not oppose	2	Does not oppose	2	Does not oppose	2	Does not oppose	neutral	complete	unvaccinated	parents	91-90	School eligible	less dissadvantaged	Au	Both AU born	1-3 partners	One parent
415	23	26	unvaccinate	unvacc	over 2 yrs		never smoked	Yes	11 to 17	yes	self	self	7 (strongly agree)	oppose	1 (strongly disagree)	Does not oppose	1 (strongly disagree)	Does not oppose	1 (strongly disagree)	Does not oppose	1 (strongly disagree)	Does not oppose	neutral	complete	unvaccinated	self	89-88	Cath up eligible		other	Both parents OS born	4+	Non religious
1305	25	26	unvaccinate	unvacc	over 2 yrs	major city	ever smoker	No	11 to 17	yes	self	self	1 (strongly disagree)	Does not oppose	2	Does not oppose	3	neutral	3	neutral	1 (strongly disagree)	Does not oppose	Does not oppose	complete	unvaccinated	self	89-88	Cath up eligible	less dissadvantaged	Au	One parent OS born	4+	Non religious
697	21	23	unvaccinate	unvacc			never smoked	Yes			self	self	1 (strongly disagree)	Does not oppose	1 (strongly disagree)	Does not oppose	1 (strongly disagree)	Does not oppose	1 (strongly disagree)	Does not oppose	1 (strongly disagree)	Does not oppose	Does not oppose	complete	unvaccinated	self	91-90	School eligible		other	Both parents OS born	None	both parents
735	20	22		schoolvac	within last 2 yrs	regoinal and remote	ever smoker	No	11 to 17	none	mum	mum	1 (strongly disagree)	Does not oppose	1 (strongly disagree)	Does not oppose	1 (strongly disagree)	Does not oppose	1 (strongly disagree)	Does not oppose	2	Does not oppose	neutral	complete	vaccinated	parents	93-92	School eligible	More dissadvantaged	Au	Both AU born	4+	One parent
212	24	26	unvaccinate	unvacc	within last 2 yrs	major city	never smoked	Yes	18 to 24	none	self	self	2	Does not oppose	1 (strongly disagree)	Does not oppose	3	neutral	3	neutral	1 (strongly disagree)	Does not oppose	neutral	incomplete	unvaccinated	self	89-88	Cath up eligible	less dissadvantaged	Au	Both parents OS born	1-3 partners	One parent
1259	25	25	unvaccinate	unvacc	within last 2 yrs		ever smoker	No	11 to 17	yes	self	self	4	neutral	1 (strongly disagree)	Does not oppose	6	oppose	6	oppose	4	neutral	Does not oppose	incomplete	unvaccinated	self	89-88	Cath up eligible		other	Both parents OS born	4+	Non religious
1336	25	26	unvaccinate	unvacc	within last 2 yrs	major city	never smoked	No	18 to 24	yes	self	self	1 (strongly disagree)	Does not oppose	1 (strongly disagree)	Does not oppose	1 (strongly disagree)	Does not oppose	1 (strongly disagree)	Does not oppose	1 (strongly disagree)	Does not oppose	Does not oppose	complete	unvaccinated	self	89-88	Cath up eligible	More dissadvantaged	Au	Both AU born	4+	both parents
1163	22	23	unvaccinate	unvacc	within last 2 yrs	regoinal and remote	never smoked	Yes	11 to 17	yes	self	self	1 (strongly disagree)	Does not oppose	1 (strongly disagree)	Does not oppose	1 (strongly disagree)	Does not oppose	1 (strongly disagree)	Does not oppose	1 (strongly disagree)	Does not oppose	Does not oppose	complete	unvaccinated	self	93-92	School eligible	less dissadvantaged	Au	One parent OS born	4+	One parent
81	24	27	unvaccinate	unvacc		regoinal and remote	never smoked	No			self	self	1 (strongly disagree)	Does not oppose	1 (strongly disagree)	Does not oppose	1 (strongly disagree)	Does not oppose	1 (strongly disagree)	Does not oppose	2	Does not oppose	Does not oppose	complete	unvaccinated	self	87-86	Cath up eligible	More dissadvantaged	Au	Both AU born	None	both parents
1264	25	26	unvaccinate	unvacc	within last 2 yrs	major city	ever smoker	Yes	11 to 17	yes	self	self	1 (strongly disagree)	Does not oppose	1 (strongly disagree)	Does not oppose	1 (strongly disagree)	Does not oppose	1 (strongly disagree)	Does not oppose	1 (strongly disagree)	Does not oppose	Does not oppose	complete	unvaccinated	self	89-88	Cath up eligible	less dissadvantaged	Au	One parent OS born	4+	Non religious
1242	25	25	unvaccinate	unvacc		regoinal and remote	never smoked	Yes	18 to 24	yes	self	self	1 (strongly disagree)	Does not oppose	1 (strongly disagree)	Does not oppose	1 (strongly disagree)	Does not oppose	1 (strongly disagree)	Does not oppose	1 (strongly disagree)	Does not oppose	Does not oppose	complete	unvaccinated	self	89-88	Cath up eligible	More dissadvantaged	Au	Both AU born	1-3 partners	both parents
487	25	27	unvaccinate	unvacc		major city	never smoked	No	18 to 24	yes	self	self	1 (strongly disagree)	Does not oppose	1 (strongly disagree)	Does not oppose	1 (strongly disagree)	Does not oppose	1 (strongly disagree)	Does not oppose	1 (strongly disagree)	Does not oppose	neutral	complete	unvaccinated	self	87-86	Cath up eligible	less dissadvantaged	Au	Both AU born	1-3 partners	Non religious
93	24	27	unvaccinate	unvacc	within last 2 yrs		never smoked	No	18 to 24	yes	self	self	1 (strongly disagree)	Does not oppose	1 (strongly disagree)	Does not oppose	1 (strongly disagree)	Does not oppose	1 (strongly disagree)	Does not oppose	1 (strongly disagree)	Does not oppose	Does not oppose	complete	unvaccinated	self	87-86	Cath up eligible		other	Both parents OS born	1-3 partners	both parents
589	19	21	unvaccinate	unvacc			ever smoker	Yes	18 to 24	yes	both parents	both parents	1 (strongly disagree)	Does not oppose	1 (strongly disagree)	Does not oppose	2	Does not oppose	1 (strongly disagree)	Does not oppose	2	Does not oppose	Does not oppose	complete	unvaccinated	parents	93-92	School eligible		other	Both parents OS born	4+	both parents
343	19	22	unvaccinate	unvacc		regoinal and remote	never smoked	Yes			self	self	1 (strongly disagree)	Does not oppose	1 (strongly disagree)	Does not oppose	1 (strongly disagree)	Does not oppose	1 (strongly disagree)	Does not oppose	1 (strongly disagree)	Does not oppose	Does not oppose	complete	unvaccinated	self	93-92	School eligible	More dissadvantaged	Au	Both AU born	None	One parent
505	23	25	unvaccinate	unvacc	within last 2 yrs		never smoked	No	18 to 24	yes	self	self	1 (strongly disagree)	Does not oppose	1 (strongly disagree)	Does not oppose	1 (strongly disagree)	Does not oppose	1 (strongly disagree)	Does not oppose	4	neutral	neutral	complete	unvaccinated	self	89-88	School eligible		other	Both parents OS born	4+	Non religious
1251	19	20	unvaccinate	unvacc			ever smoker	Yes	18 to 24	yes	self	self	1 (strongly disagree)	Does not oppose	1 (strongly disagree)	Does not oppose	1 (strongly disagree)	Does not oppose	1 (strongly disagree)	Does not oppose	6	oppose	Does not oppose	complete	unvaccinated	self	96-94	School eligible		other	Both parents OS born		both parents
265	24	27	unvaccinate	unvacc		major city	never smoked	No	18 to 24	yes	self	self	1 (strongly disagree)	Does not oppose	1 (strongly disagree)	Does not oppose	1 (strongly disagree)	Does not oppose	1 (strongly disagree)	Does not oppose	1 (strongly disagree)	Does not oppose	Does not oppose	complete	unvaccinated	self	87-86	Cath up eligible	less dissadvantaged	Au	Both AU born	4+	both parents
